# Supplementary material for: Effects of new hypoglycemic drugs on cardiac remodeling: a systematic review and network meta-analysis
Source: PubMed Central journal article supplement (PMC10251583; doi:10.1186/s12872-023-03324-6), 2023-06-09
Supplement: 12872_2023_3324_MOESM2_ESM.pdf [file 12872_2023_3324_MOESM2_ESM.pdf]

Table S1 Characteristics of included studies

| Study                              | Year | Age         | Male% | Patients | Sample size | Treatmet            | Country     |
|------------------------------------|------|-------------|-------|----------|-------------|---------------------|-------------|
| Ikonomidis et al. <sup>1</sup>     | 2020 | 58(10)      | 71.9  | T2DM+CVD | 80          | GLP-1RA,<br>SGLT-2i | Greece      |
| Paiman et al. <sup>2</sup>         | 2019 | 55 (11)     | 40.0  | T2DM     | 47          | GLP-1RA             | Netherlands |
| Santos-Gallego et al. <sup>3</sup> | 2021 | 62(12.1)    | 64.0  | CVD      | 80          | SGLT-2i             | USA         |
| Akasaka et al. <sup>4</sup>        | 2022 | 71.9(8)     | 60.3  | T2DM+CVD | 68          | SGLT-2i             | Japan       |
| Rau et al. <sup>5</sup>            | 2021 | 62(6.8)     | 77.2  | T2DM     | 42          | SGLT-2i             | Germany     |
| Verma et al. <sup>6</sup>          | 2019 | 63.3(9)     | 46.4  | T2DM+CVD | 90          | SGLT-2i             | Canada      |
| Hiruma et al. <sup>7</sup>         | 2021 | 52.8(9.7)   | 72.0  | T2DM     | 42          | SGLT-2i             | Japan       |
| Brown et al. <sup>8</sup>          | 2020 | 65.53(6.87) | 57.6  | T2DM+CVD | 66          | SGLT-2i             | UK          |
| Bojer et al. <sup>9</sup>          | 2021 | 62.2 (10)   | 80.0  | T2DM+CVD | 40          | GLP-1RA             | Denmark     |
| Cioffi et al. <sup>10</sup>        | 2021 | 69(9)       | 55.8  | T2DM     | 187         | DPP-4i              | Italy       |

|                              |      |            |      |          |     |                    |             |
|------------------------------|------|------------|------|----------|-----|--------------------|-------------|
| Singh et al. <sup>11</sup>   | 2020 | 67.1(6.9)  | 66.1 | T2DM+CVD | 56  | SGLT-2i            | UK          |
| Bami et al. <sup>12</sup>    | 2020 | 63.3 (9)   | 92.7 | T2DM+CVD | 97  | SGLT-2i            | Canada      |
| Webb et al. <sup>13</sup>    | 2020 | 43.4(7)    | 46.0 | T2DM     | 61  | DPP-4i,<br>GLP-1RA | UK          |
| Omar et al. <sup>14</sup>    | 2021 | 64(11)     | 85.3 | T2DM+CVD | 179 | SGLT-2i            | Denmark     |
| Oldgren et al. <sup>15</sup> | 2021 | 64.4(7.2)  | 53.0 | T2DM     | 49  | SGLT-2i            | Sweden      |
| Ersbøll et al. <sup>16</sup> | 2022 | 66.2 (9.2) | 80.5 | T2DM+CVD | 87  | SGLT-2i            | Denmark     |
| Lee et al. <sup>17</sup>     | 2020 | 68.7(11.1) | 73.3 | T2DM+CVD | 92  | SGLT-2i            | UK          |
| Bizino et al. <sup>18</sup>  | 2019 | 60(6)      | 59.2 | T2DM     | 49  | GLP-1RA            | Netherlands |
| Otagaki et al. <sup>19</sup> | 2019 | 65(13.8)   | 69.1 | T2DM     | 42  | SGLT-2i            | Japan       |
| Chen et al. <sup>20</sup>    | 2015 | 57.7(11.3) | 73.3 | CVD      | 83  | GLP-1RA            | China       |
| Jorsal et al. <sup>21</sup>  | 2017 | 65(9.2)    | 89.2 | T2DM+CVD | 241 | GLP-1RA            | Denmark     |
| Lepore et al. <sup>22</sup>  | 2016 | 56(10)     | 74.0 | CVD      | 56  | GLP-1RA            | USA         |

|                                     |      |             |      |          |     |         |          |
|-------------------------------------|------|-------------|------|----------|-----|---------|----------|
| Sardu et al. <sup>23</sup>          | 2018 | 72(6)       | 72.1 | T2DM+CVD | 559 | GLP-1RA | Italy    |
| Yamada et al. <sup>24</sup>         | 2017 | 69(8)       | 67.0 | T2DM     | 115 | DPP-4i  | Japan    |
| Yamamoto et al. <sup>25</sup>       | 2017 | 71(10)      | 63.8 | CVD+T2DM | 137 | DPP-4i  | Japan    |
| Zhang et al. <sup>26</sup>          | 2017 | 59.1(11.8)  | 75.0 | CVD      | 52  | GLP-1RA | China    |
| Zhang et al. <sup>27</sup>          | 2022 | 56.32(12.2) | 83.3 | CVD      | 56  | SGLT-2i | China    |
| E.Reis et al. <sup>28</sup>         | 2022 | 60.9(13)    | 82.5 | CVD      | 40  | SGLT-2i | Portugal |
| E.Nassif et al. <sup>29</sup>       | 2021 | 70.1(9.68)  | 49.4 | CVD      | 324 | SGLT-2i | USA      |
| Mason et al. <sup>30</sup>          | 2021 | 62(8)       | 91.9 | T2DM+CVD | 74  | SGLT-2i | Canada   |
| Kumarathurai et al. <sup>31</sup>   | 2021 | 63.1(6.6)   | 80.0 | T2DM+CVD | 58  | GLP-1RA | Denmark  |
| Abraham et al. <sup>32</sup>        | 2021 | 69.7(9.7)   | 65.0 | CVD      | 627 | SGLT-2i | USA      |
| Gamaza-Chulián et al. <sup>33</sup> | 2021 | 66.8(8.6)   | 55.8 | T2DM     | 52  | SGLT-2i | Spain    |
| Jensen et al. <sup>34</sup>         | 2020 | 64.7(12)    | 85.3 | CVD      | 186 | SGLT-2i | Denmark  |
| Nielsen et al. <sup>35</sup>        | 2020 | 65.2(9.4)   | 90.1 | T2DM+CVD | 208 | GLP-1RA | Denmark  |

---

Note: CVD cardiovascular disease, DPP-4i dipeptidyl peptidase-4 inhibitor; GLP-1RA glucagon-like peptide-1 receptor agonist, SGLT-2i sodium glucose cotransporter type 2 inhibitor, T2DM type 2 diabetes mellitus.

#### List of included literature:

1. Ikonomidis I, Pavlidis G, Thymis J, et al. Effects of Glucagon-Like Peptide-1 Receptor Agonists, Sodium-Glucose Cotransporter-2 Inhibitors, and Their Combination on Endothelial Glycocalyx, Arterial Function, and Myocardial Work Index in Patients With Type 2 Diabetes Mellitus After 12-Month Treatment. *J Am Heart Assoc.* 2020;9(9):e015716. <https://doi.org/10.1161/JAHA.119.015716>
2. Paiman E, van Eyk HJ, van Aalst M, et al. Effect of Liraglutide on Cardiovascular Function and Myocardial Tissue Characteristics in Type 2 Diabetes Patients of South Asian Descent Living in the Netherlands: A Double-Blind, Randomized, Placebo-Controlled Trial. *J Magn Reson Imaging.* 2020;51(6):1679-88. <https://doi.org/10.1002/jmri.27009>
3. Santos-Gallego CG, Vargas-Delgado AP, Requena-Ibanez JA, et al. Randomized Trial of Empagliflozin in Nondiabetic Patients With Heart Failure and Reduced Ejection Fraction. *J Am Coll Cardiol.* 2021;77(3):243-55. <https://doi.org/10.1016/j.jacc.2020.11.008>
4. Akasaka H, Sugimoto K, Shintani A, et al. Effects of ipragliflozin on left ventricular diastolic function in patients with type 2 diabetes and heart failure with preserved ejection fraction: The EXCEED randomized controlled multicenter study. *Geriatr Gerontol Int.* 2022;22(4):298-304. <https://doi.org/10.1186/s12933-020-01175-5>
5. Rau M, Thiele K, Hartmann NK, et al. Empagliflozin does not change cardiac index nor systemic vascular resistance but rapidly improves left ventricular filling pressure in patients with type 2 diabetes: a randomized controlled study. *Cardiovasc Diabetol.* 2021;20(1):6. <https://doi.org/10.1111/ggi.14363>
6. Verma A, Meris A, Skali H, et al. Prognostic implications of left ventricular mass and geometry following myocardial infarction: the VALIANT (VALsartan In Acute myocardial iNfarcTion) Echocardiographic Study. *JACC Cardiovasc Imaging.* 2008;1(5):582-91. <https://doi.org/10.1016/j.jcmg.2010.10.008>
7. Hiruma S, Shigiyama F, Hisatake S, et al. A prospective randomized study comparing effects of empagliflozin to sitagliptin on cardiac fat

- accumulation, cardiac function, and cardiac metabolism in patients with early-stage type 2 diabetes: the ASSET study. *Cardiovasc Diabetol.* 2021;20(1):32. <https://doi.org/10.1186/s12933-021-01228-3>
8. Brown A, Gandy S, McCrimmon R, et al. A randomized controlled trial of dapagliflozin on left ventricular hypertrophy in people with type two diabetes: the DAPA-LVH trial. *Eur Heart J.* 2020;41(36):3421-32. <https://doi.org/10.1093/eurheartj/ehaa419>
9. Bojer AS, Sørensen MH, Bjerre J, et al. Metabolic improvement with short-term, glucagon-like peptide-1 receptor agonist treatment does not improve cardiac diastolic dysfunction in patients with type 2 diabetes: A randomized, double-blind, placebo-controlled trial. *Diabetes Obes Metab.* 2021;23(10):2374-84. <https://doi.org/10.1177/2047487320939217>
10. Cioffi G, Giorda CB, Lucci D, et al. Effects of linagliptin on left ventricular DYsfunction in patients with type 2 DiAbetes and concentric left ventricular geometry: results of the DYDA 2 trial. *Eur J Prev Cardiol.* 2021;28(1):8-17. <https://doi.org/10.1016/j.echo.2020.02.005>
11. Singh J, Mordi IR, Vickneson K, et al. Dapagliflozin Versus Placebo on Left Ventricular Remodeling in Patients With Diabetes and Heart Failure: The REFORM Trial. *Diabetes Care.* 2020;43(6):1356-9. <https://doi.org/10.2337/dc19-2187>
12. Bami K, Gandhi S, Leong-Poi H, et al. Effects of Empagliflozin on Left Ventricular Remodeling in Patients with Type 2 Diabetes and Coronary Artery Disease: Echocardiographic Substudy of the EMPA-HEART CardioLink-6 Randomized Clinical Trial. *J Am Soc Echocardiogr.* 2020;33(5):644-6. <https://doi.org/10.1111/dom.14480>
13. Webb DR, Htike ZZ, Swarbrick DJ, et al. A randomized, open-label, active comparator trial assessing the effects of 26 weeks of liraglutide or sitagliptin on cardiovascular function in young obese adults with type 2 diabetes. *Diabetes Obes Metab.* 2020;22(7):1187-96. <https://doi.org/10.1111/dom.14023>
14. Omar M, Jensen J, Ali M, et al. Associations of Empagliflozin With Left Ventricular Volumes, Mass, and Function in Patients With Heart Failure and Reduced Ejection Fraction: A Substudy of the Empire HF Randomized Clinical Trial. *JAMA Cardiol.* 2021;6(7):836-40. <https://doi.org/10.1002/ejhf.657>
15. Oldgren J, Laurila S, Åkerblom A, et al. Effects of 6 weeks of treatment with dapagliflozin, a sodium-glucose co-transporter-2 inhibitor, on myocardial function and metabolism in patients with type 2 diabetes: A randomized, placebo-controlled, exploratory study. *Diabetes Obes Metab.* 2021;23(7):1505-17. <https://doi.org/10.1007/s12020-015-0798-0>
16. Ersbøl M, Jürgens M, Hasbak P, et al. Effect of empagliflozin on myocardial structure and function in patients with type 2 diabetes at high cardiovascular risk: the SIMPLE randomized clinical trial. *Int J Cardiovasc Imaging.* 2022;38(3):579-87.

<https://doi.org/10.1016/j.jchf.2016.01.008>

17. Lee M, Brooksbank K, Wetherall K, et al. Effect of Empagliflozin on Left Ventricular Volumes in Patients With Type 2 Diabetes, or Prediabetes, and Heart Failure With Reduced Ejection Fraction (SUGAR-DM-HF). *Circulation*. 2021;143(6):516-25.

<https://doi.org/10.1007/s10557-019-06892-y>

18. Bizino MB, Jazet IM, Westenberg J, et al. Effect of liraglutide on cardiac function in patients with type 2 diabetes mellitus: randomized placebo-controlled trial. *Cardiovasc Diabetol*. 2019;18(1):55. <https://doi.org/10.1161/CIRCULATIONAHA.120.052186>

19. Otagaki M, Matsumura K, Kin H, et al. Effect of Tofogliflozin on Systolic and Diastolic Cardiac Function in Type 2 Diabetic Patients.

*Cardiovasc Drugs Ther*. 2019;33(4):435-42. <https://doi.org/10.1186/s12933-019-0857-6>

20. Chen WR, Shen XQ, Zhang Y, et al. Effects of liraglutide on left ventricular function in patients with non-ST-segment elevation myocardial infarction. *Endocrine*. 2016;52(3):516-26. <https://doi.org/10.1001/jamacardio.2020.6827>

21. Jorsal A, Kistorp C, Holmager P, et al. Effect of liraglutide, a glucagon-like peptide-1 analogue, on left ventricular function in stable chronic heart failure patients with and without diabetes (LIVE)-a multicentre, double-blind, randomised, placebo-controlled trial. *Eur J Heart Fail*.

2017;19(1):69-77. <https://doi.org/10.1007/s10554-021-02443-5>

22. Lepore JJ, Olson E, Demopoulos L, et al. Effects of the Novel Long-Acting GLP-1 Agonist, Albiglutide, on Cardiac Function, Cardiac Metabolism, and Exercise Capacity in Patients With Chronic Heart Failure and Reduced Ejection Fraction. *JACC Heart Fail*. 2016;4(7):559-66.

<https://doi.org/10.1111/dom.14363>

23. Sardu C, Paolisso P, Sacra C, et al. Cardiac resynchronization therapy with a defibrillator (CRTd) in failing heart patients with type 2 diabetes mellitus and treated by glucagon-like peptide 1 receptor agonists (GLP-1 RA) therapy vs. conventional hypoglycemic drugs: arrhythmic burden, hospitalizations for heart failure, and CRTd responders rate. *Cardiovasc Diabetol*. 2018;17(1):137.

24. Yamada H, Tanaka A, Kusunose K, et al. Effect of sitagliptin on the echocardiographic parameters of left ventricular diastolic function in patients with type 2 diabetes: a subgroup analysis of the PROLOGUE study. *Cardiovasc Diabetol*. 2017;16(1):63.

<https://doi.org/10.1186/s12933-017-0546-2>

25. Yamamoto M, Seo Y, Ishizu T, et al. Effect of Dipeptidyl Peptidase-4 Inhibitors on Cardiovascular Outcome and Cardiac Function in Patients With Diabetes and Heart Failure - Insights From the Ibaraki Cardiac Assessment Study-Heart Failure (ICAS-HF) Registry. *Circ J*.

2017;81(11):1662-9. <https://doi.org/10.1253/circj.CJ-17-0240>

26. Zhang JY, Wang XY, Wang X. Effects of liraglutide on hemodynamic parameters in patients with heart failure. *Oncotarget*.

2017;8(37):62693-702. <https://doi.org/10.18632/oncotarget.18570>

27. Zhang H, Liu Z. Effects of Dapagliflozin in Combination with Metoprolol Sustained-Release Tablets on Prognosis and Cardiac Function in Patients with Acute Myocardial Infarction after PCI. *Comput Math Methods Med.* 2022;2022:5734876. <https://doi.org/10.1155/2022/5734876>

28. Reis J, Teixeira AR, Gonçalves AV, et al. Dapagliflozin Impact on the Exercise Capacity of Non-Diabetic Heart Failure with Reduced Ejection Fraction Patients. *J Clin Med.* 2022;11(10). <https://doi.org/10.3390/jcm11102935>

29. Nassif ME, Windsor SL, Borlaug BA, et al. The SGLT2 inhibitor dapagliflozin in heart failure with preserved ejection fraction: a multicenter randomized trial. *Nat Med.* 2021;27(11):1954-60. <https://doi.org/10.1111/dom.14135>

30. Mason T, Coelho-Filho OR, Verma S, et al. Empagliflozin Reduces Myocardial Extracellular Volume in Patients With Type 2 Diabetes and Coronary Artery Disease. *JACC Cardiovasc Imaging.* 2021;14(6):1164-73. <https://doi.org/10.1016/j.ahj.2020.07.011>

31. Kumarathurai P, Sajadieh A, Anholm C, et al. Effects of liraglutide on diastolic function parameters in patients with type 2 diabetes and coronary artery disease: a randomized crossover study. *Cardiovasc Diabetol.* 2021;20(1):12. <https://doi.org/10.1186/s12933-020-01205-2>

32. Abraham WT, Lindenfeld J, Ponikowski P, et al. Effect of empagliflozin on exercise ability and symptoms in heart failure patients with reduced and preserved ejection fraction, with and without type 2 diabetes. *Eur Heart J.* 2021;42(6):700-10. <https://doi.org/10.1093/eurheartj/ehaa943>

33. Gamaza-Chulián S, Dáz-Retamino E, González-Testón F, et al. Effect of sodium-glucose cotransporter 2 (SGLT2) inhibitors on left ventricular remodelling and longitudinal strain: a prospective observational study. *BMC Cardiovasc Disord.* 2021;21(1):456. <https://doi.org/10.1186/s12872-021-02250-9>

34. Jensen J, Omar M, Kistorp C, et al. Twelve weeks of treatment with empagliflozin in patients with heart failure and reduced ejection fraction: A double-blinded, randomized, and placebo-controlled trial. *Am Heart J.* 2020;228:47-56. <https://doi.org/10.1038/s41591-021-01536-x>

35. Nielsen R, Jorsal A, Tougaard RS, et al. The impact of the glucagon-like peptide-1 receptor agonist liraglutide on natriuretic peptides in heart failure patients with reduced ejection fraction with and without type 2 diabetes. *Diabetes Obes Metab.* 2020;22(11):2141-50. <https://doi.org/10.1016/j.jcmg.2020.10.017>
