# Supplementary material for: Effects of new hypoglycemic drugs on cardiac remodeling: a systematic review and network meta-analysis
Source: PubMed Central journal article supplement (PMC10251583; doi:10.1186/s12872-023-03324-6), 2023-06-09
Supplement: 12872_2023_3324_MOESM3_ESM.pdf [file 12872_2023_3324_MOESM3_ESM.pdf]

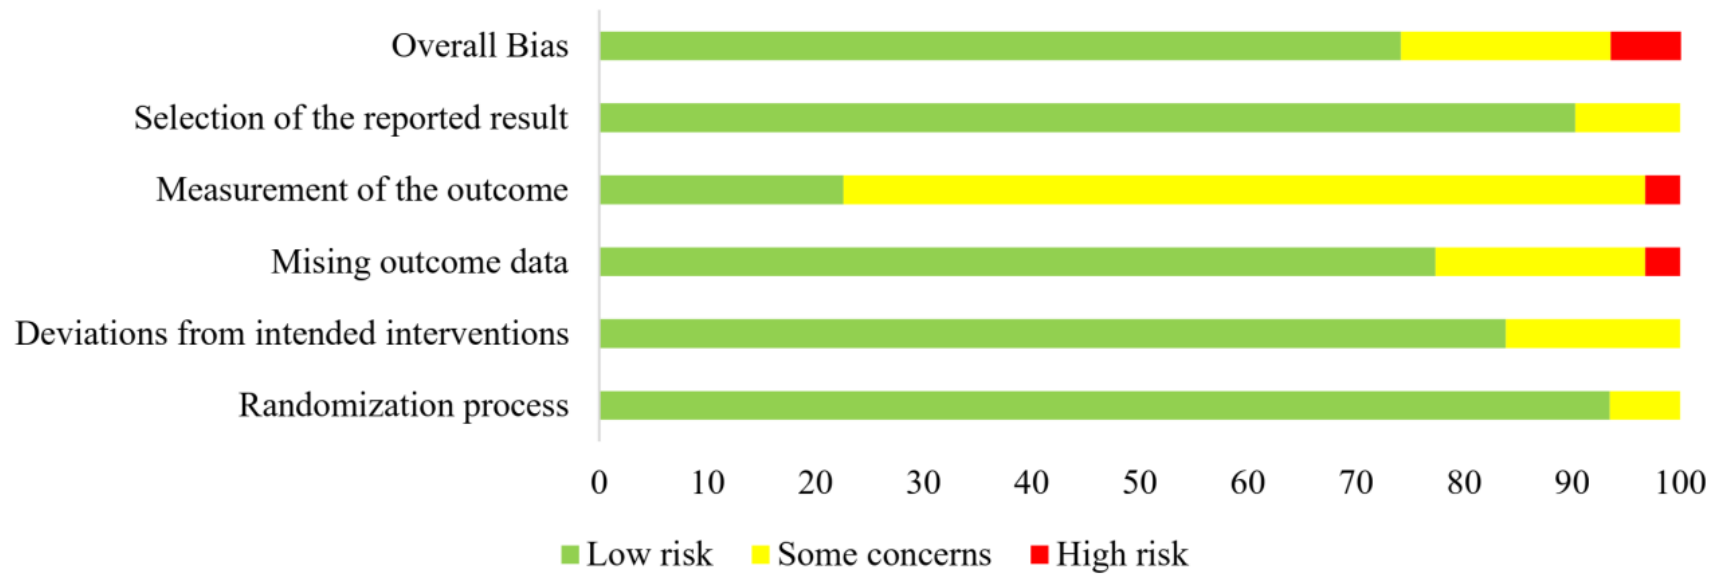

Figure S1 Risk of bias graph

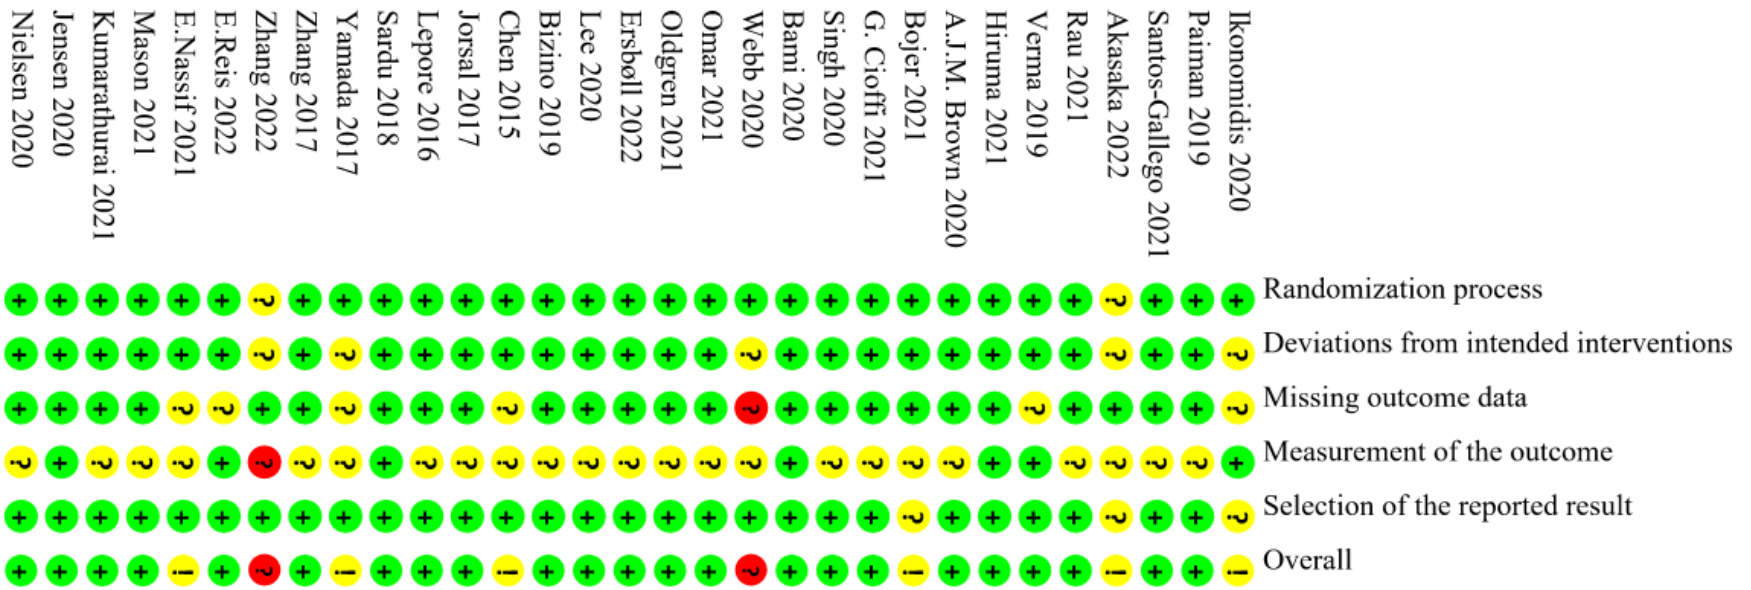

Figure S2 Risk of bias summary

Table S2 The Newcastle-Ottawa Quality Assessment Scale for included controlled studies

| Study                               | Selection of the study groups | Comparability of the groups | Outcome | Total score |
|-------------------------------------|-------------------------------|-----------------------------|---------|-------------|
| Otagaki et al. <sup>19</sup>        | ****                          | **                          | **      | 8           |
| Sardu et al. <sup>23</sup>          | ****                          | **                          | ***     | 9           |
| Yamamoto et al. <sup>25</sup>       | ****                          | **                          | ***     | 9           |
| Gamaza-Chulián et al. <sup>33</sup> | ****                          | *                           | ***     | 8           |

Note: References in table S2 can be found in Additional file 2: characteristics of studies.
