# Supplementary material for: Effects of new hypoglycemic drugs on cardiac remodeling: a systematic review and network meta-analysis
Source: PubMed Central journal article supplement (PMC10251583; doi:10.1186/s12872-023-03324-6), 2023-06-09
Supplement: 12872_2023_3324_MOESM6_ESM.pdf [file 12872_2023_3324_MOESM6_ESM.pdf]

FigureS5 Forest plot of mean difference

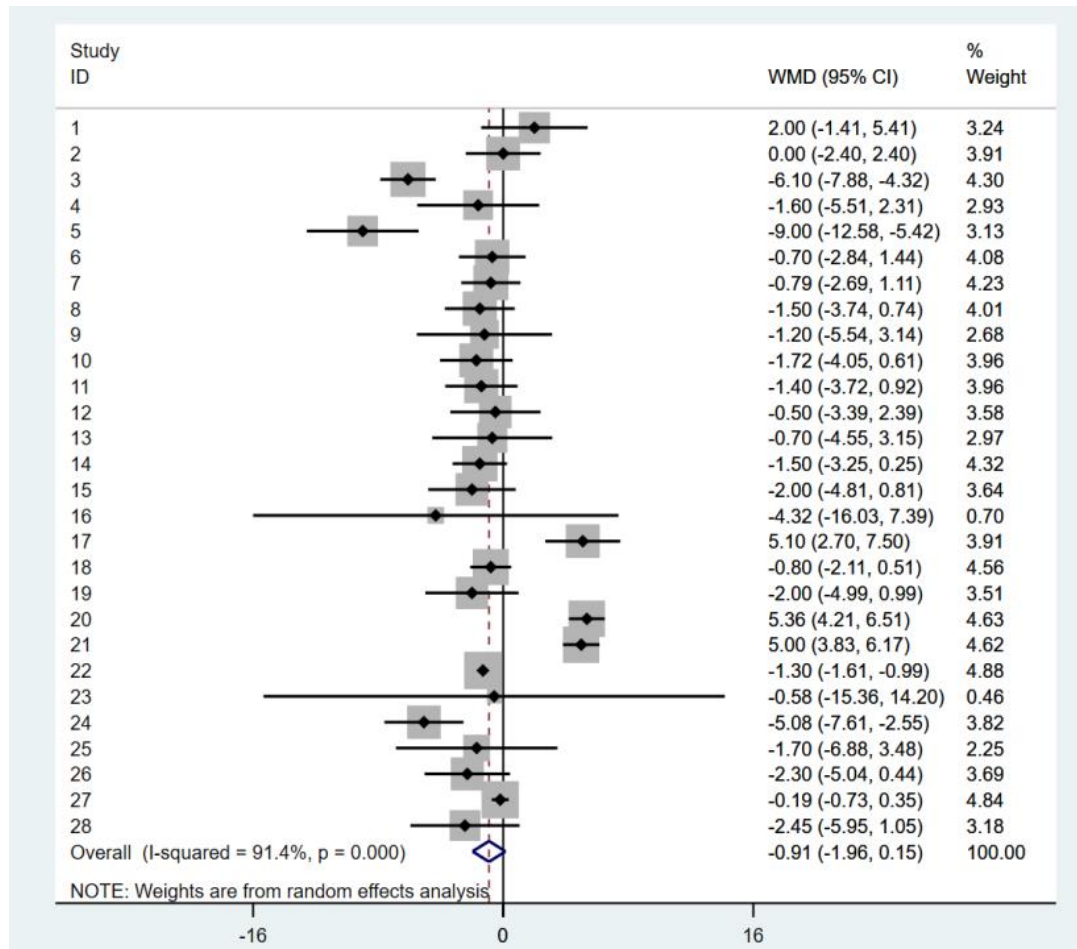

FigureS5(a) Forest plot of mean difference of LVEF%

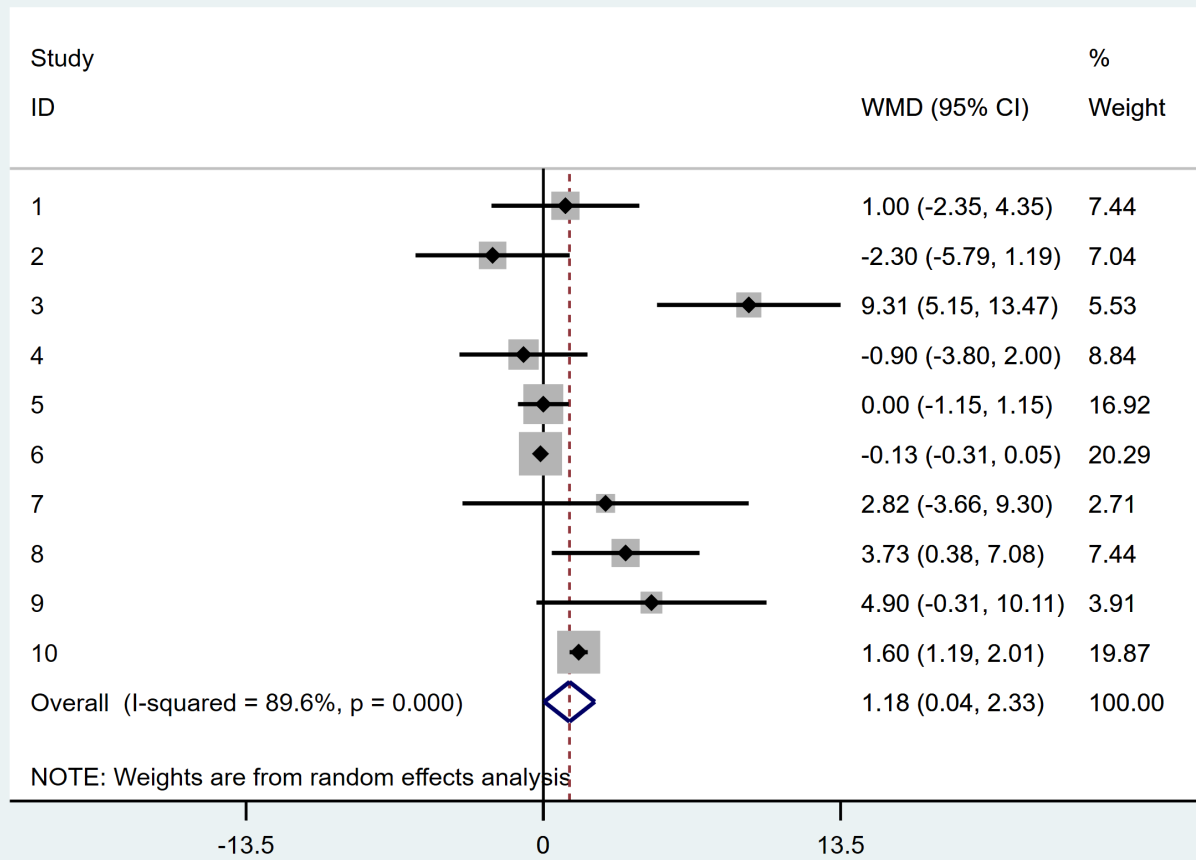

FigureS5(b) Forest plot of mean difference of LVEDD

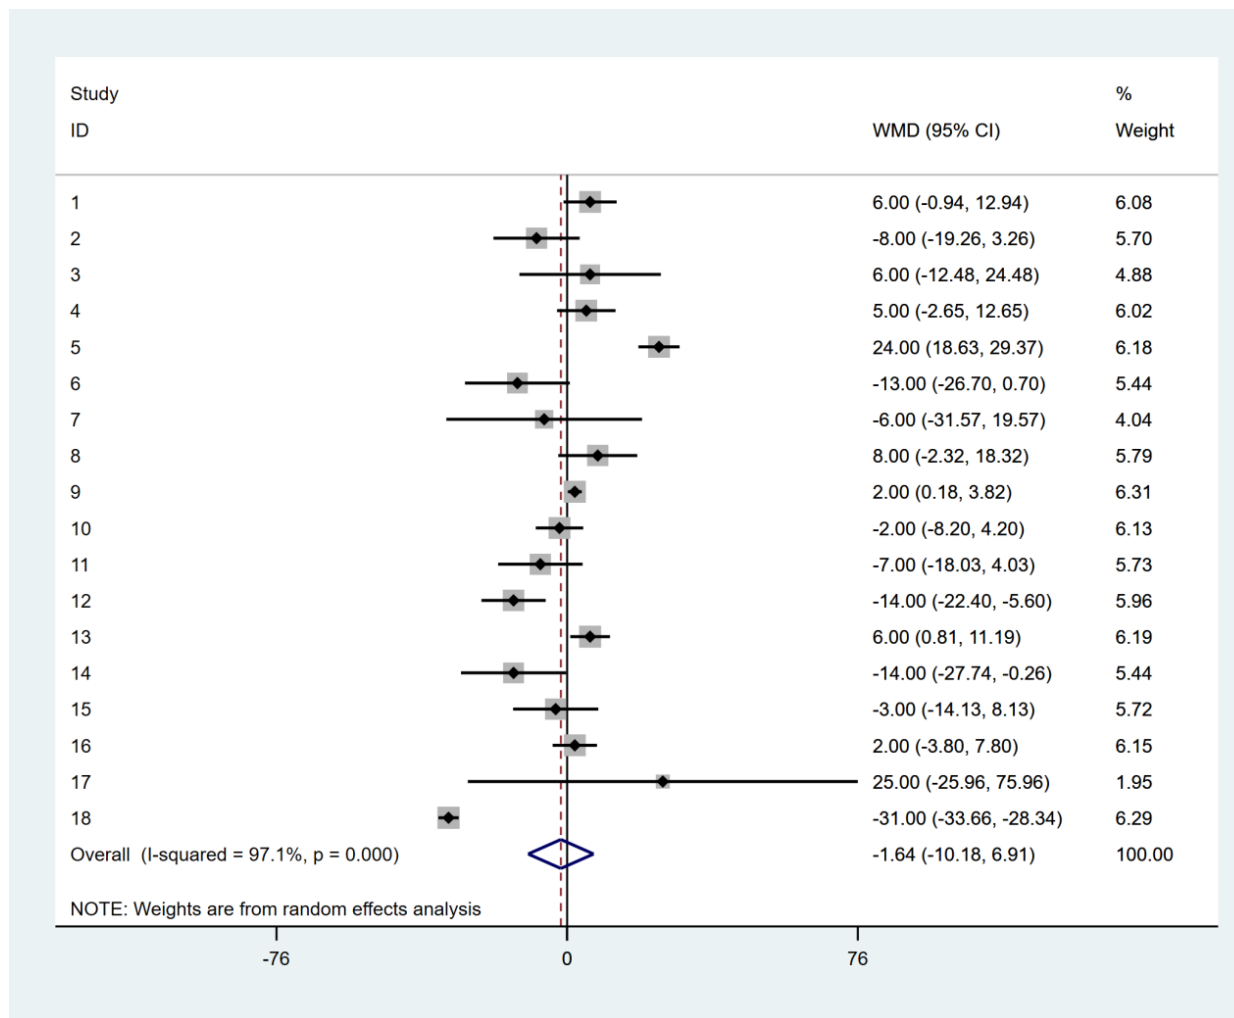

FigureS5(c) Forest plot of mean difference of LVEDV

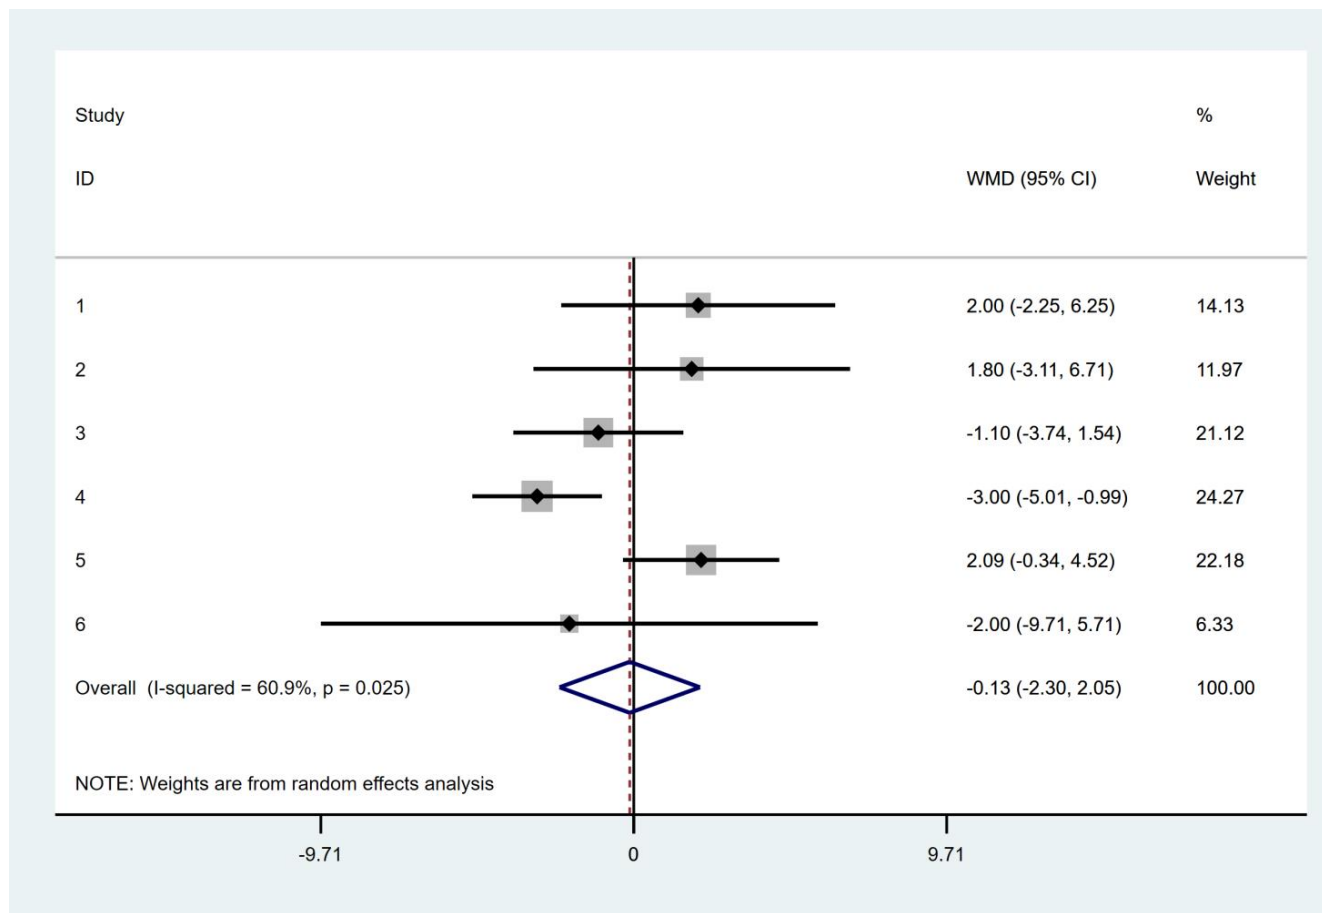

FigureS5(d) Forest plot of mean difference of LVESD

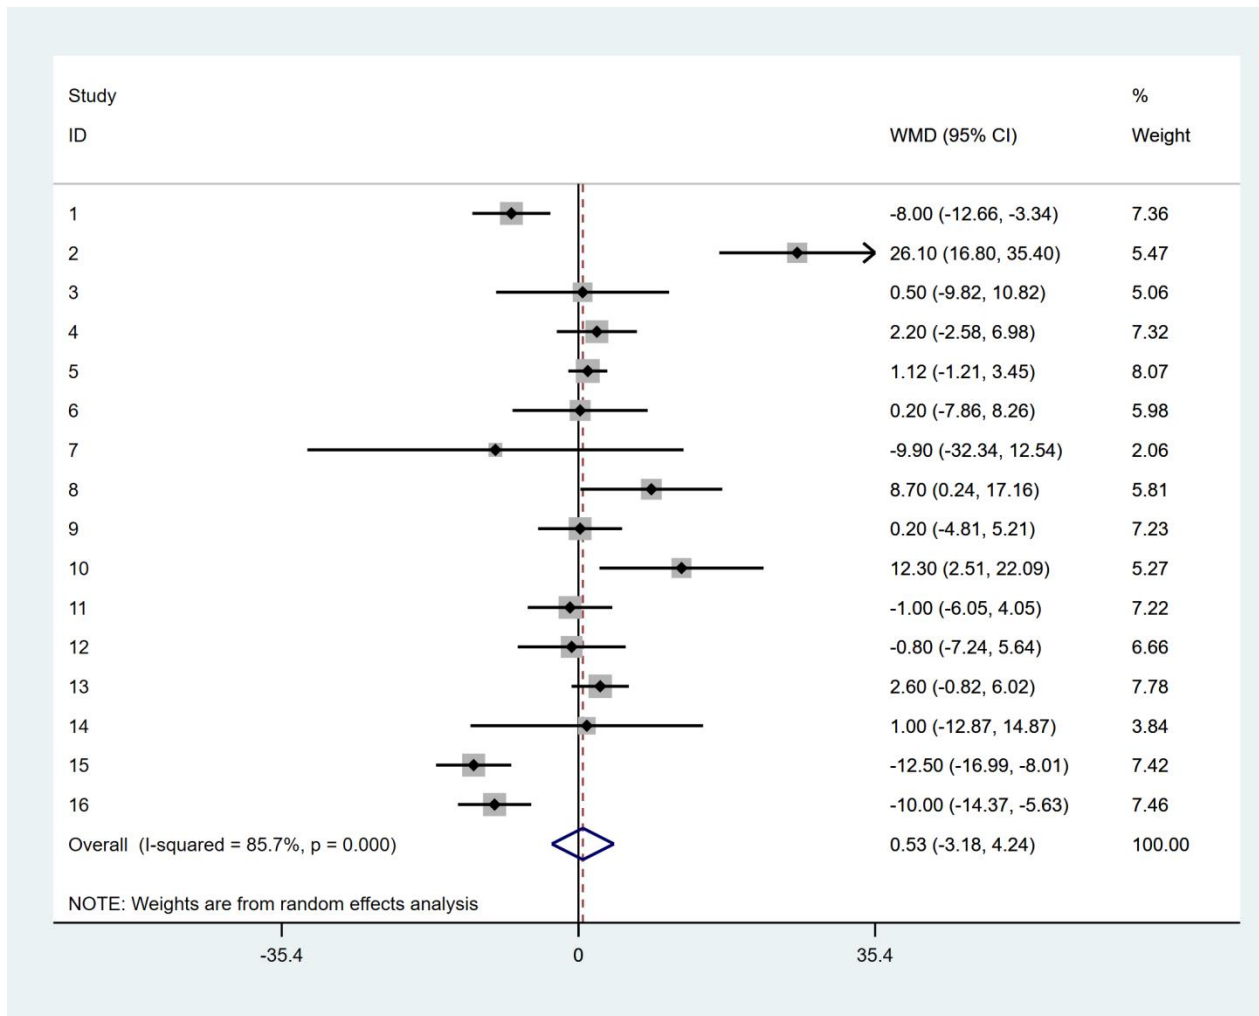

FigureS5(e) Forest plot of mean difference of LVESV

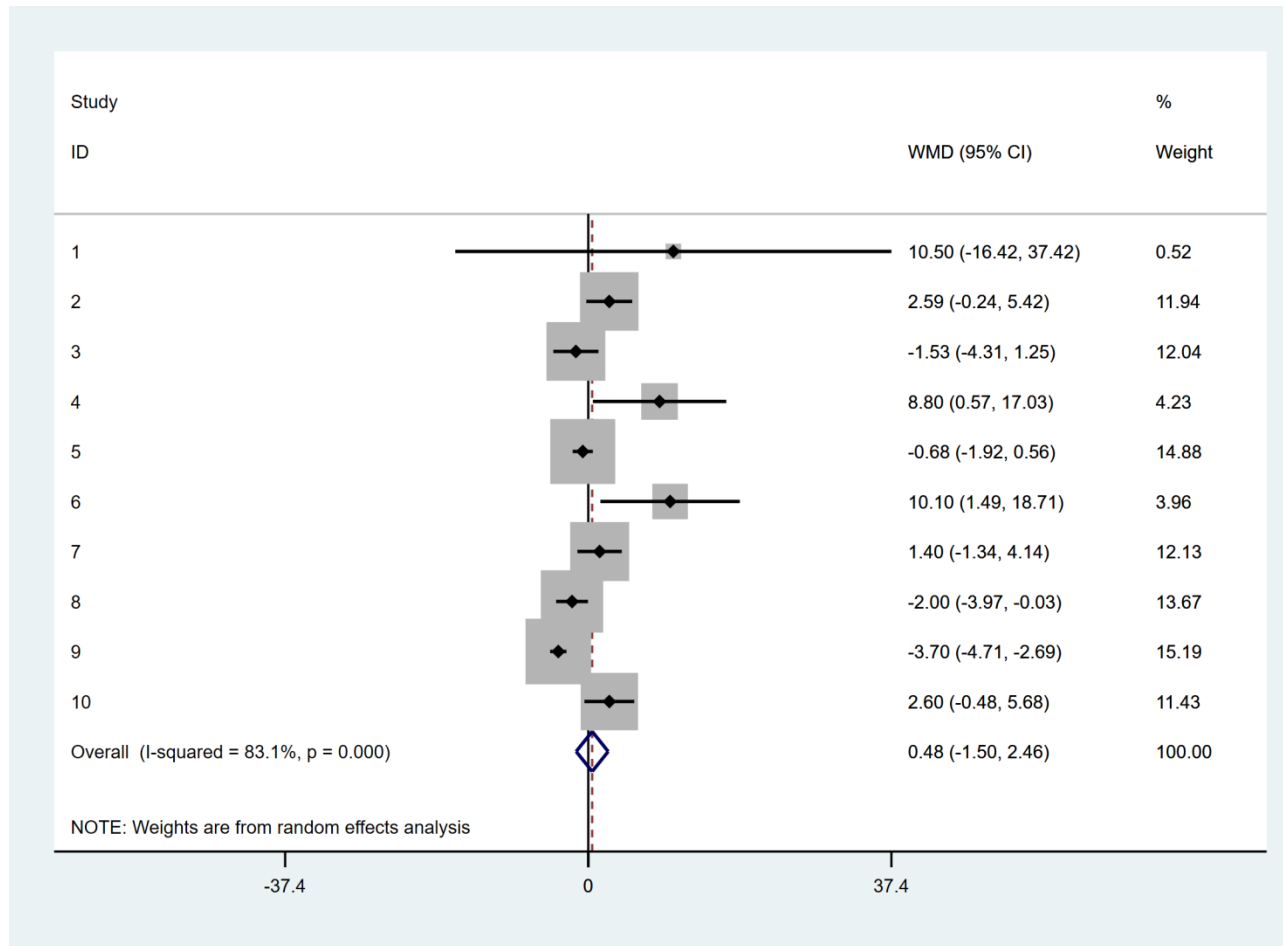

FigureS5(f) Forest plot of mean difference of LVM

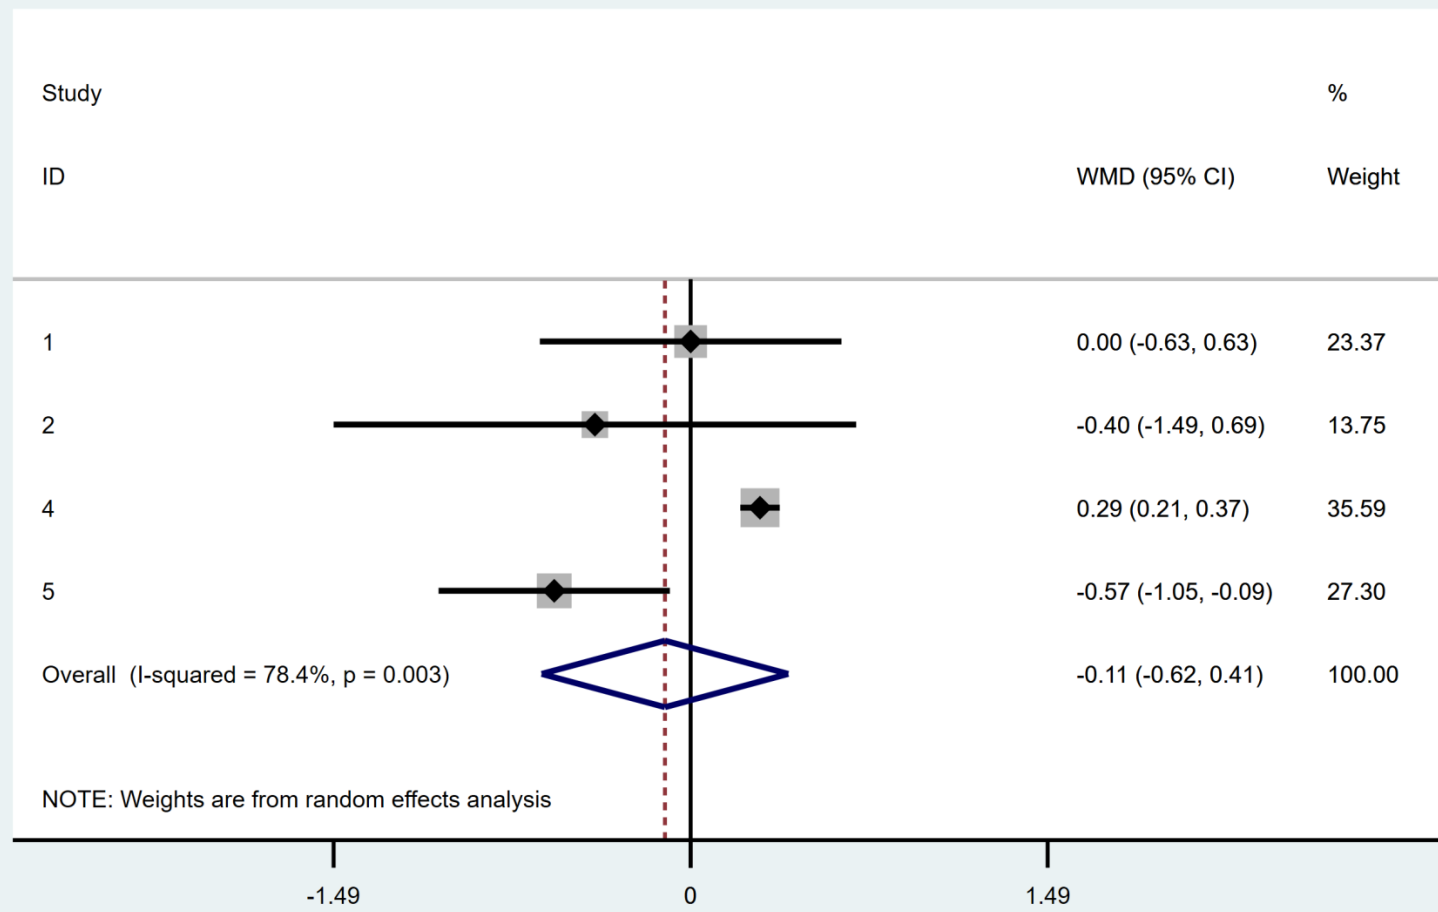

FigureS5(g) Forest plot of mean difference of e'

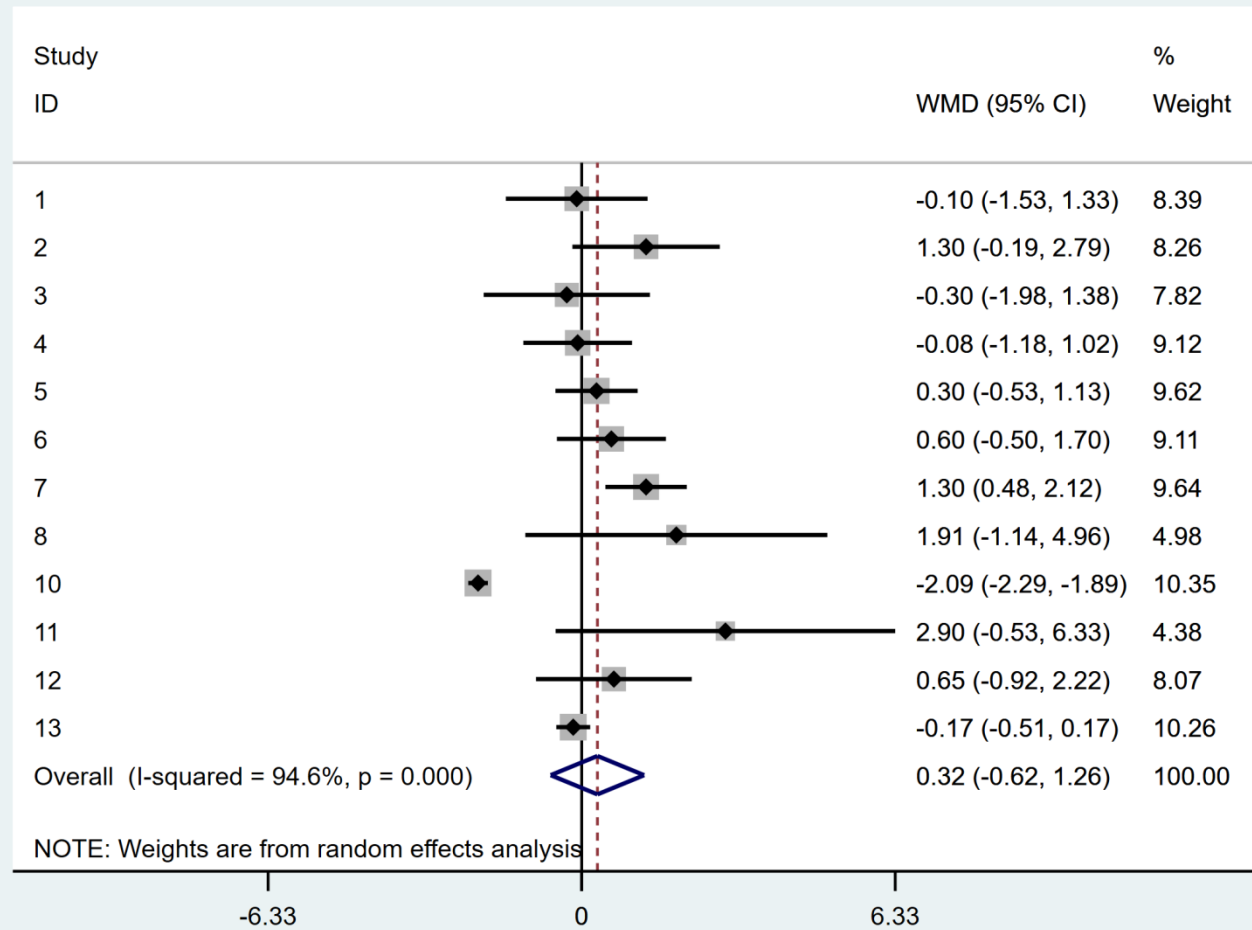

FigureS5(h) Forest plot of mean difference of E/e'



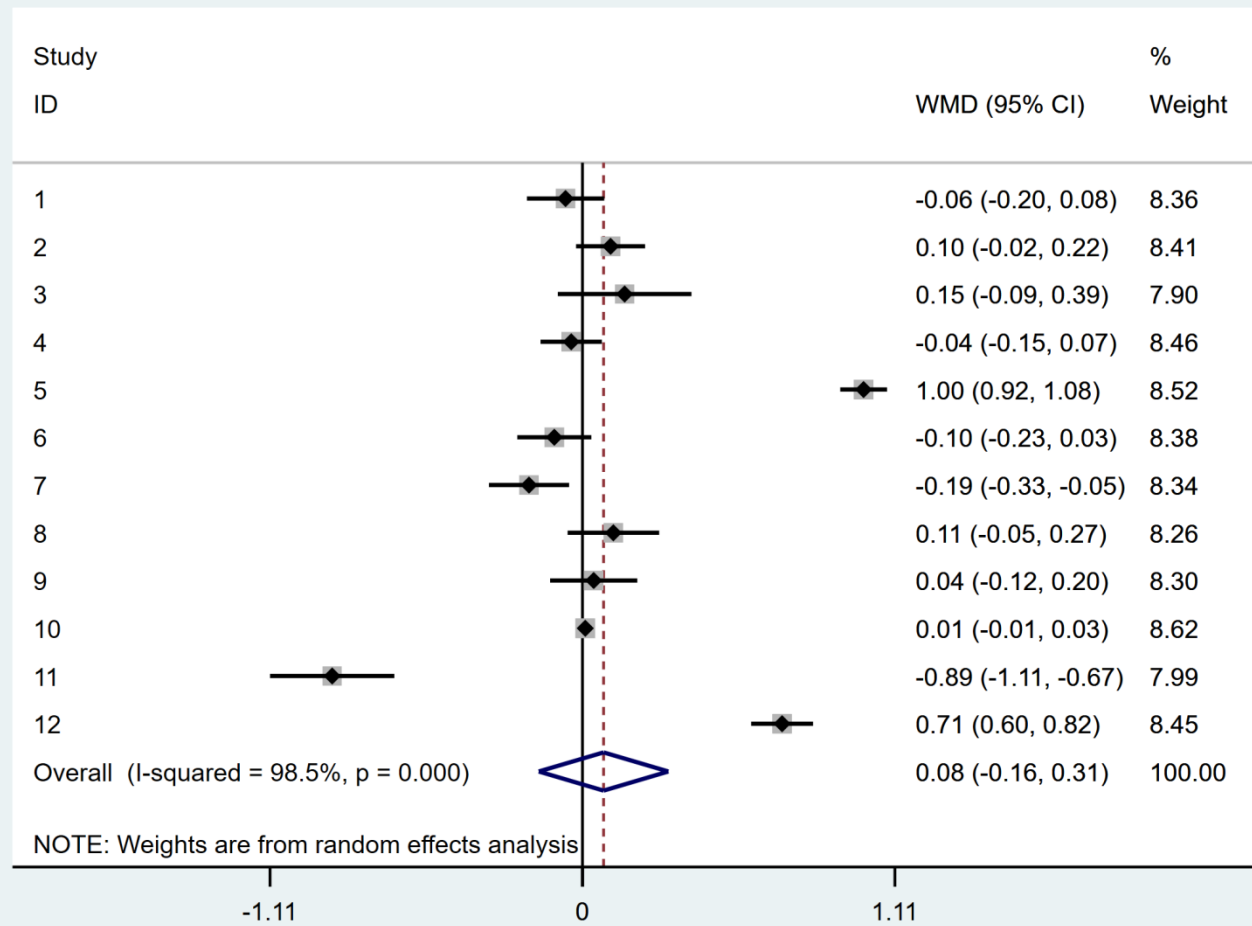

FigureS5(i) Forest plot of mean difference of E/A

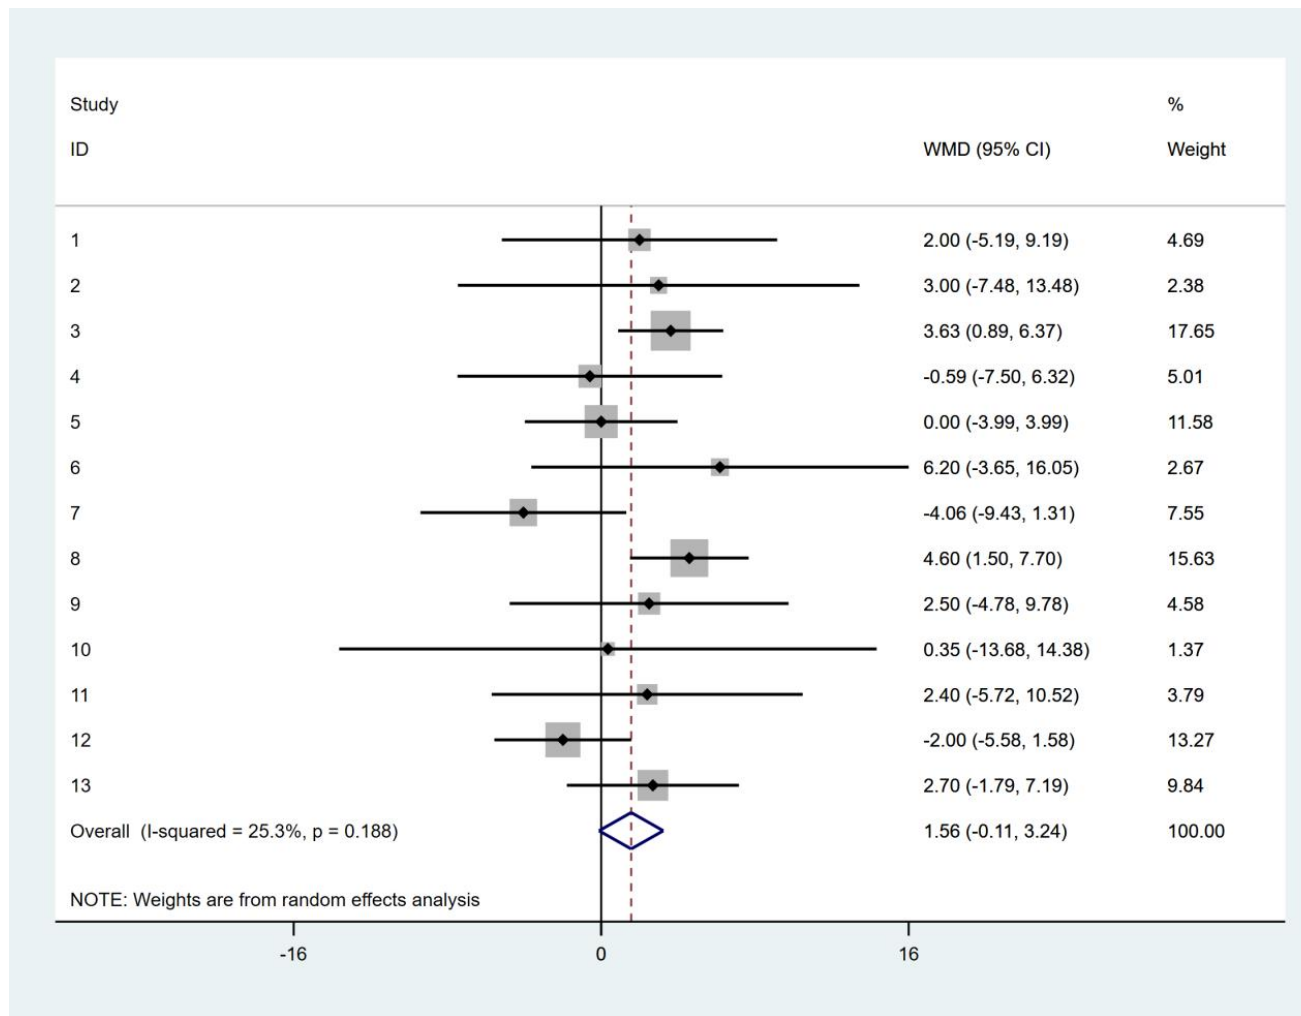

FigureS5(j) Forest plot of mean difference of SBP

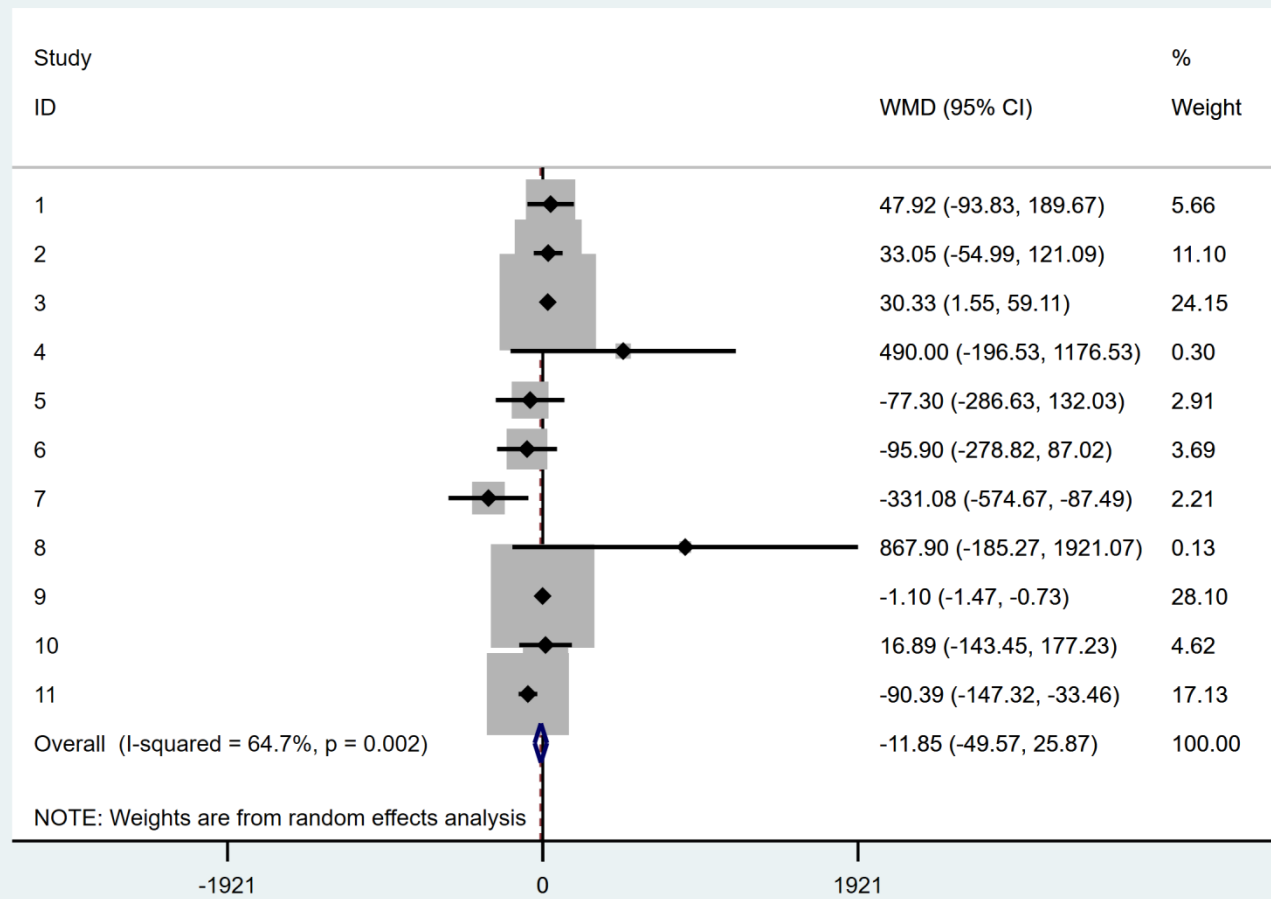

FigureS5(k) Forest plot of mean difference of NT-pro BNP

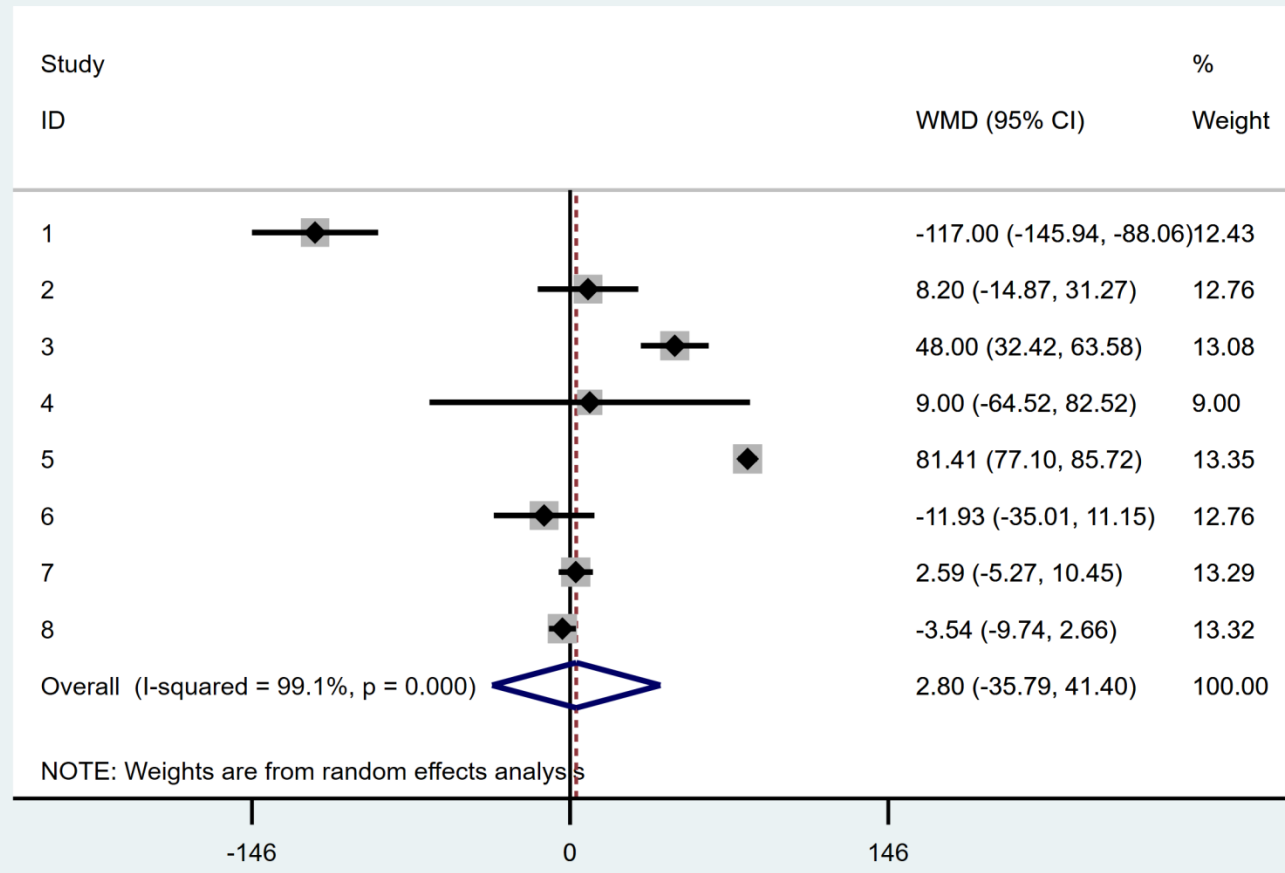

FigureS5(1) Forest plot of mean difference of 6MWT

### Subgroup of patients with T2DM and CVD

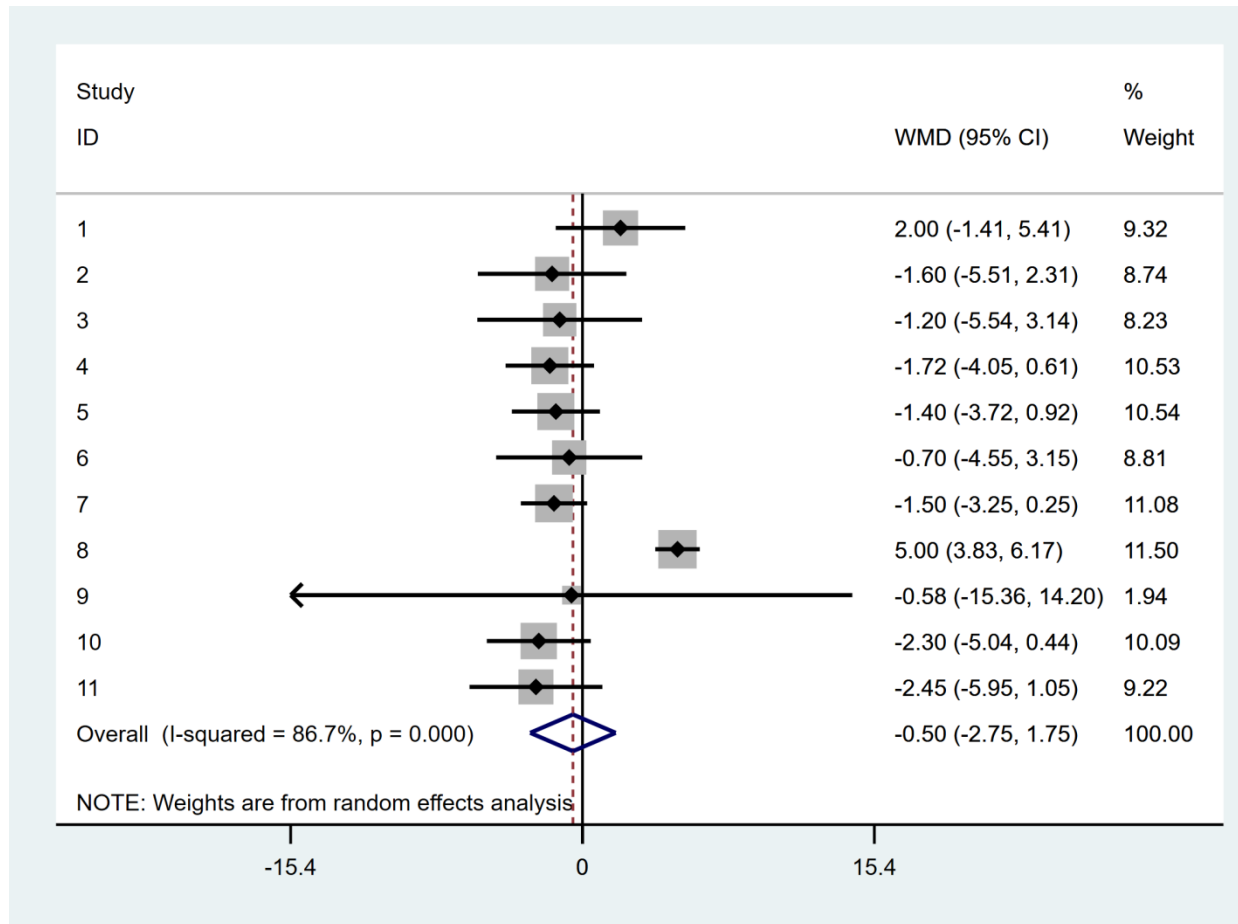

FigureS5(m) Forest plot of mean difference of LVEF%

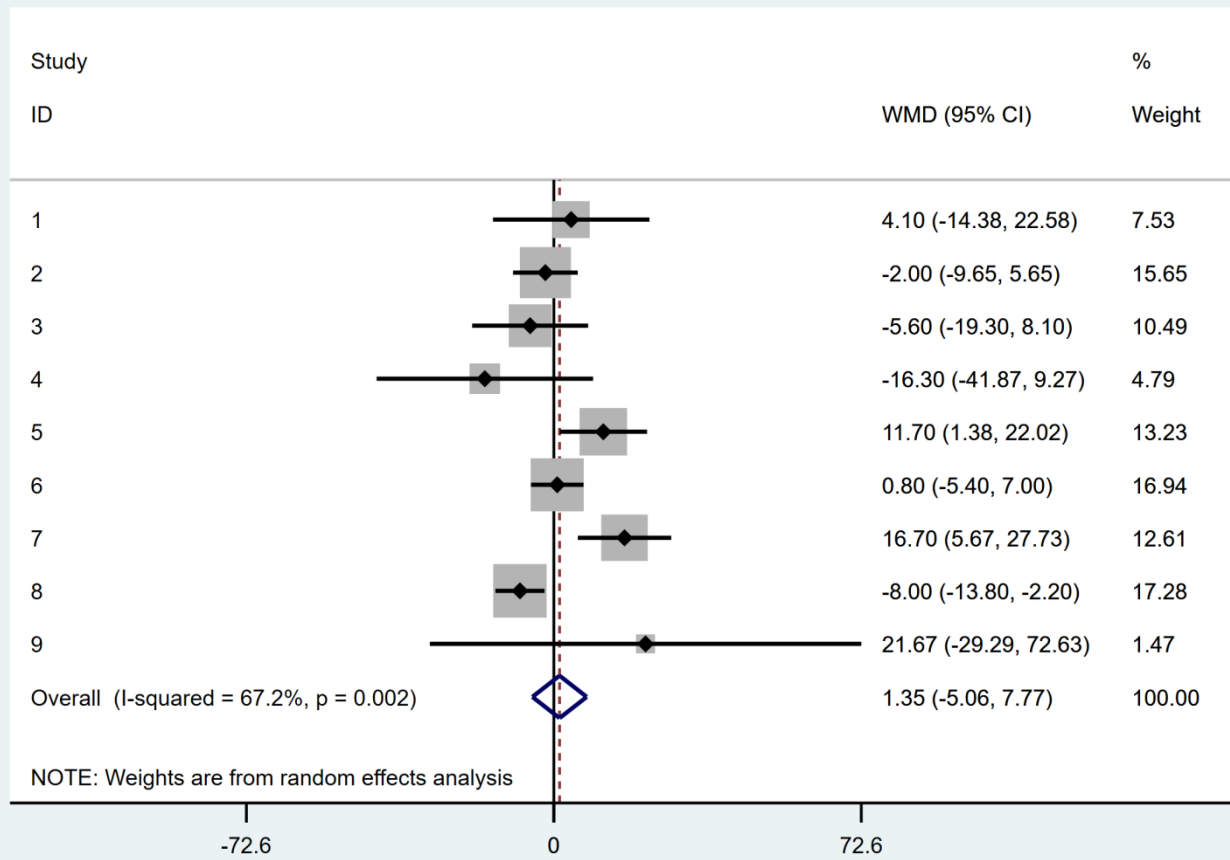

FigureS5(n) Forest plot of mean difference of LVEDV

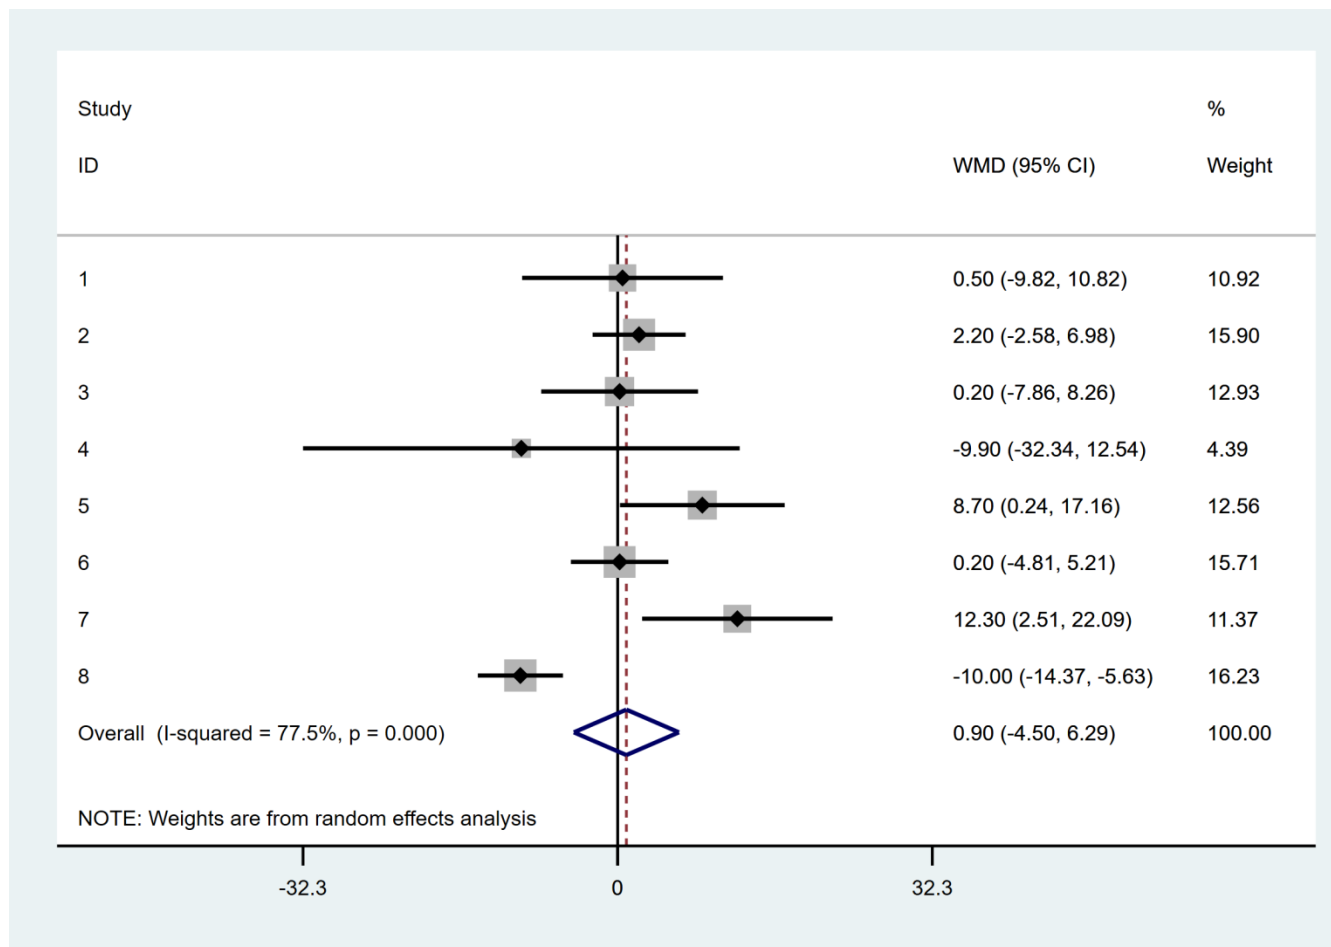

FigureS5(o) Forest plot of mean difference of LVESV

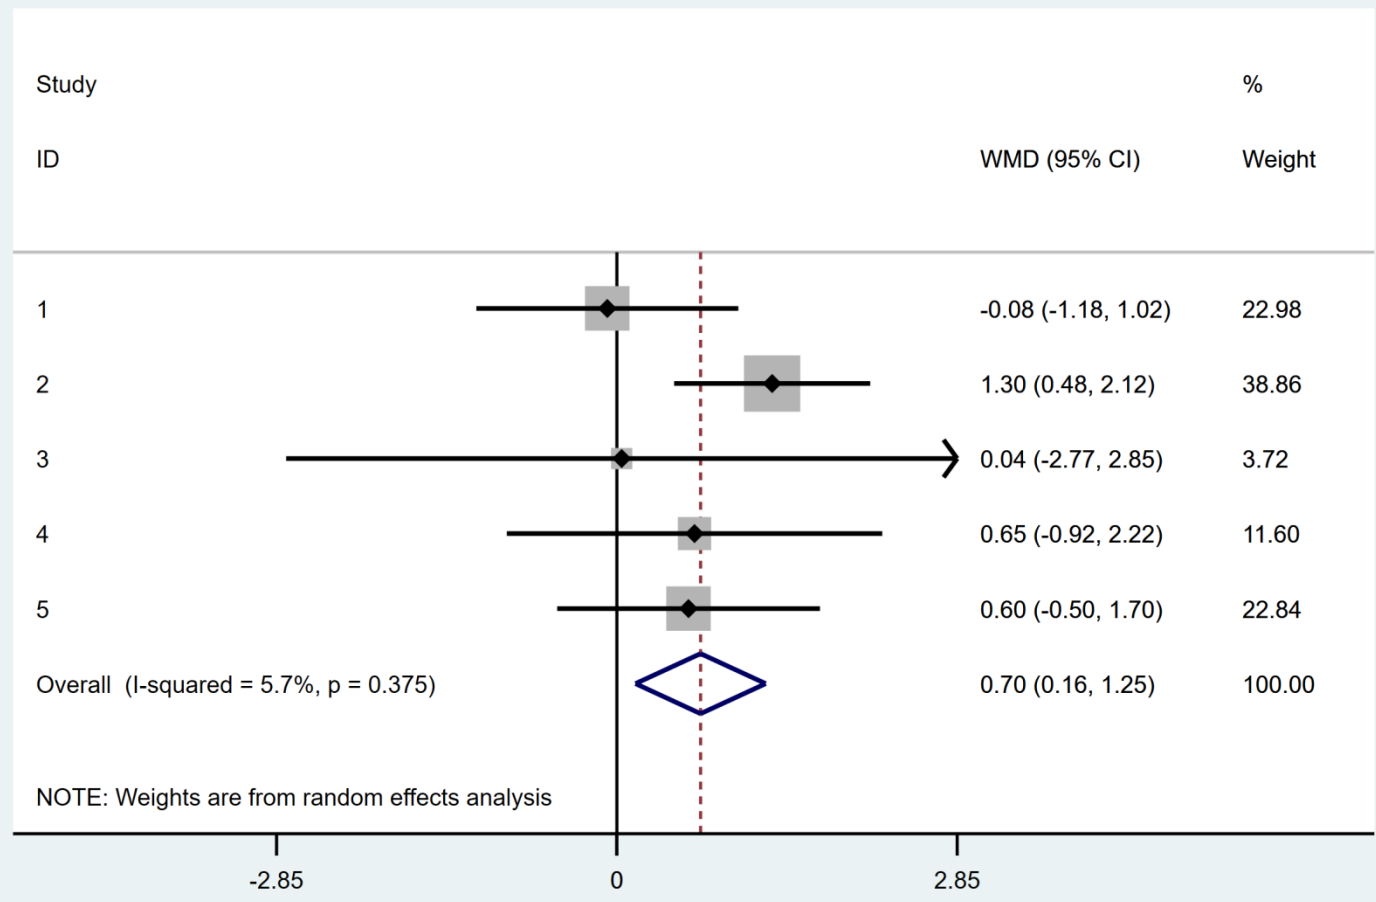

FigureS5(p) Forest plot of mean difference of E/e'



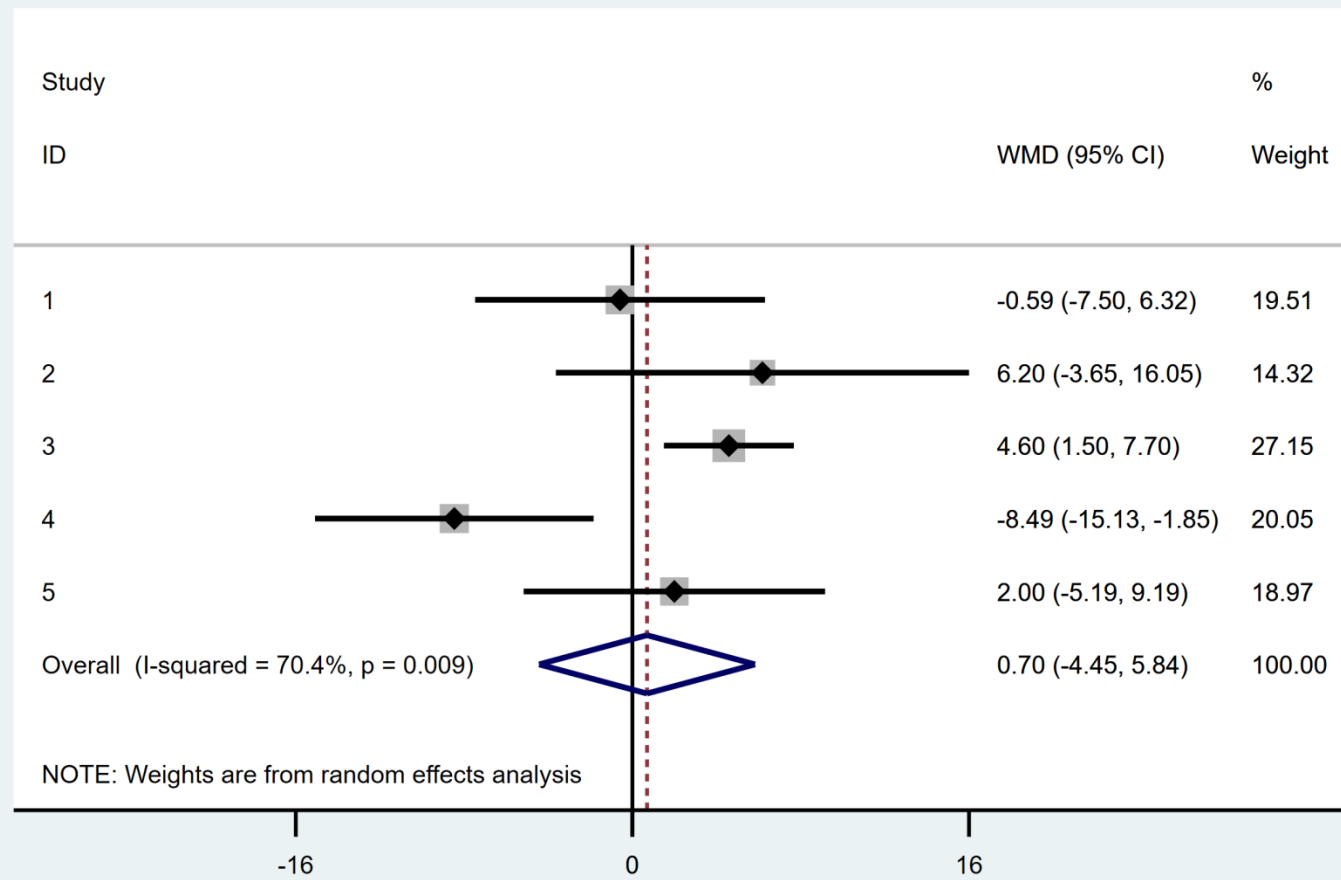

FigureS5(q) Forest plot of mean difference of SBP

### Subgroup of patients with CVD alone

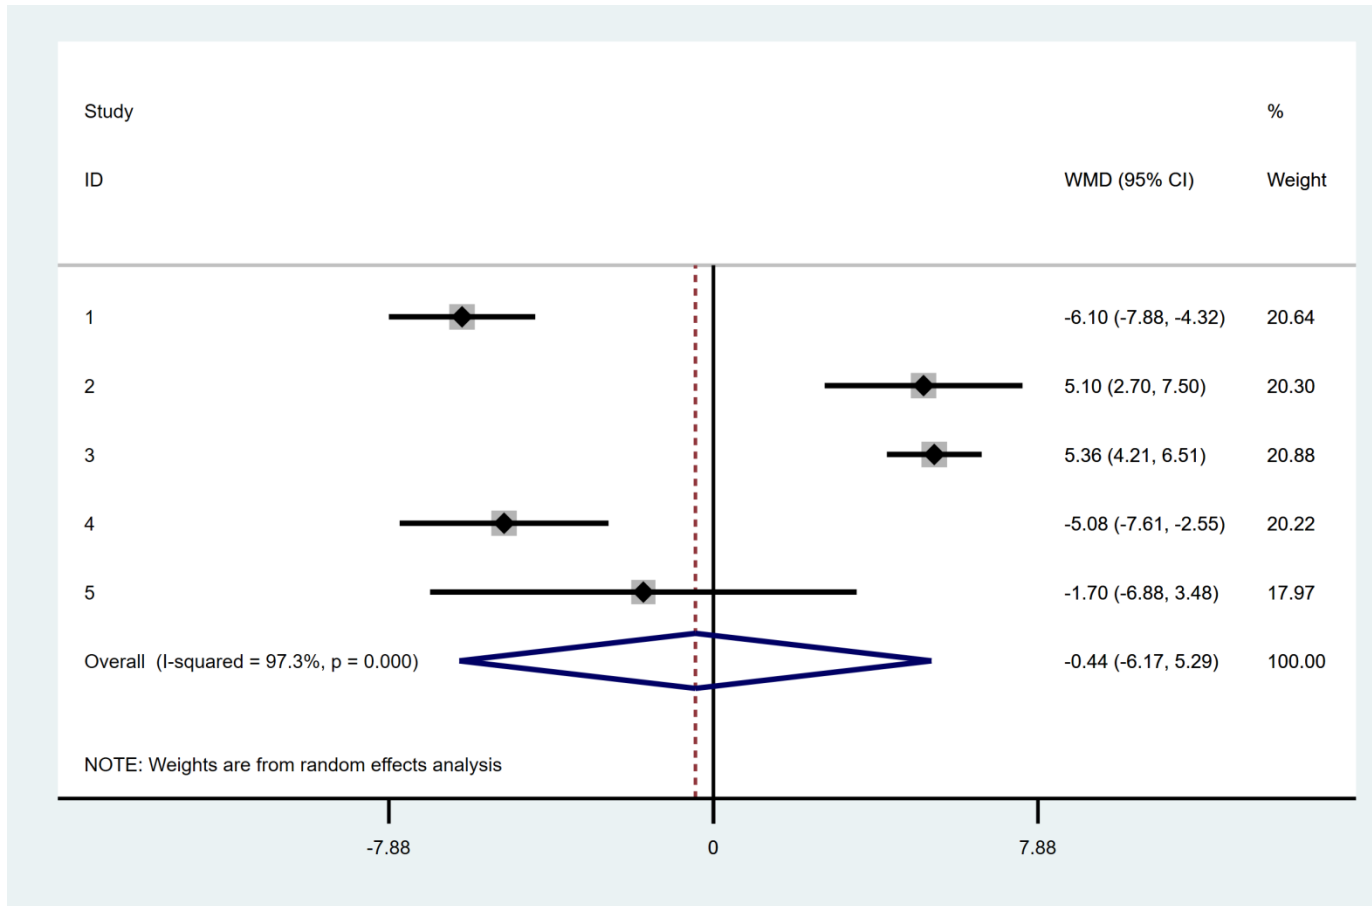

FigureS5(r) Forest plot of mean difference of LVEF%

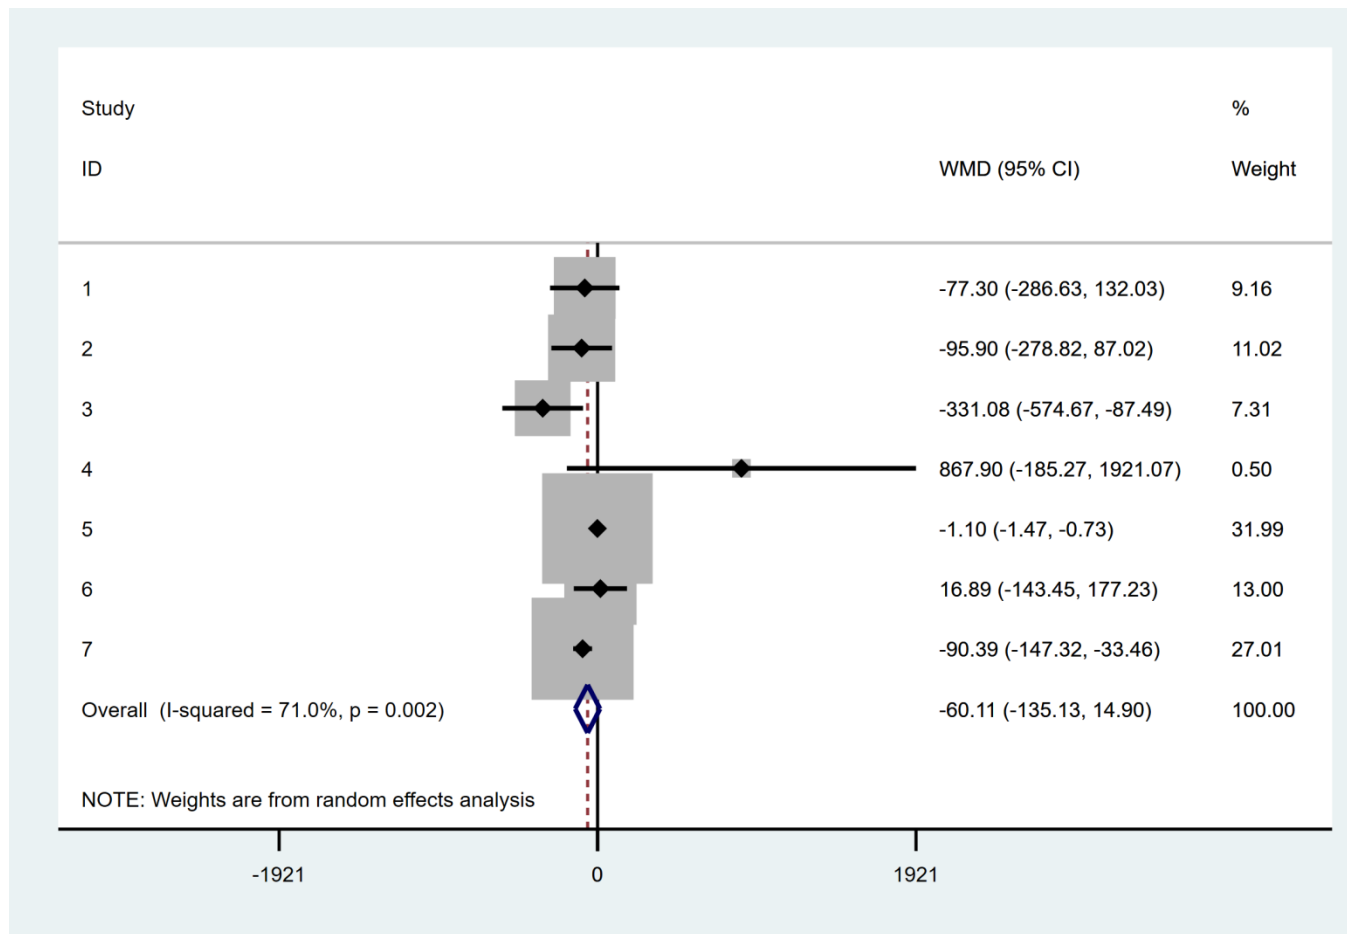

FigureS5(s) Forest plot of mean difference of NT-pro BNP

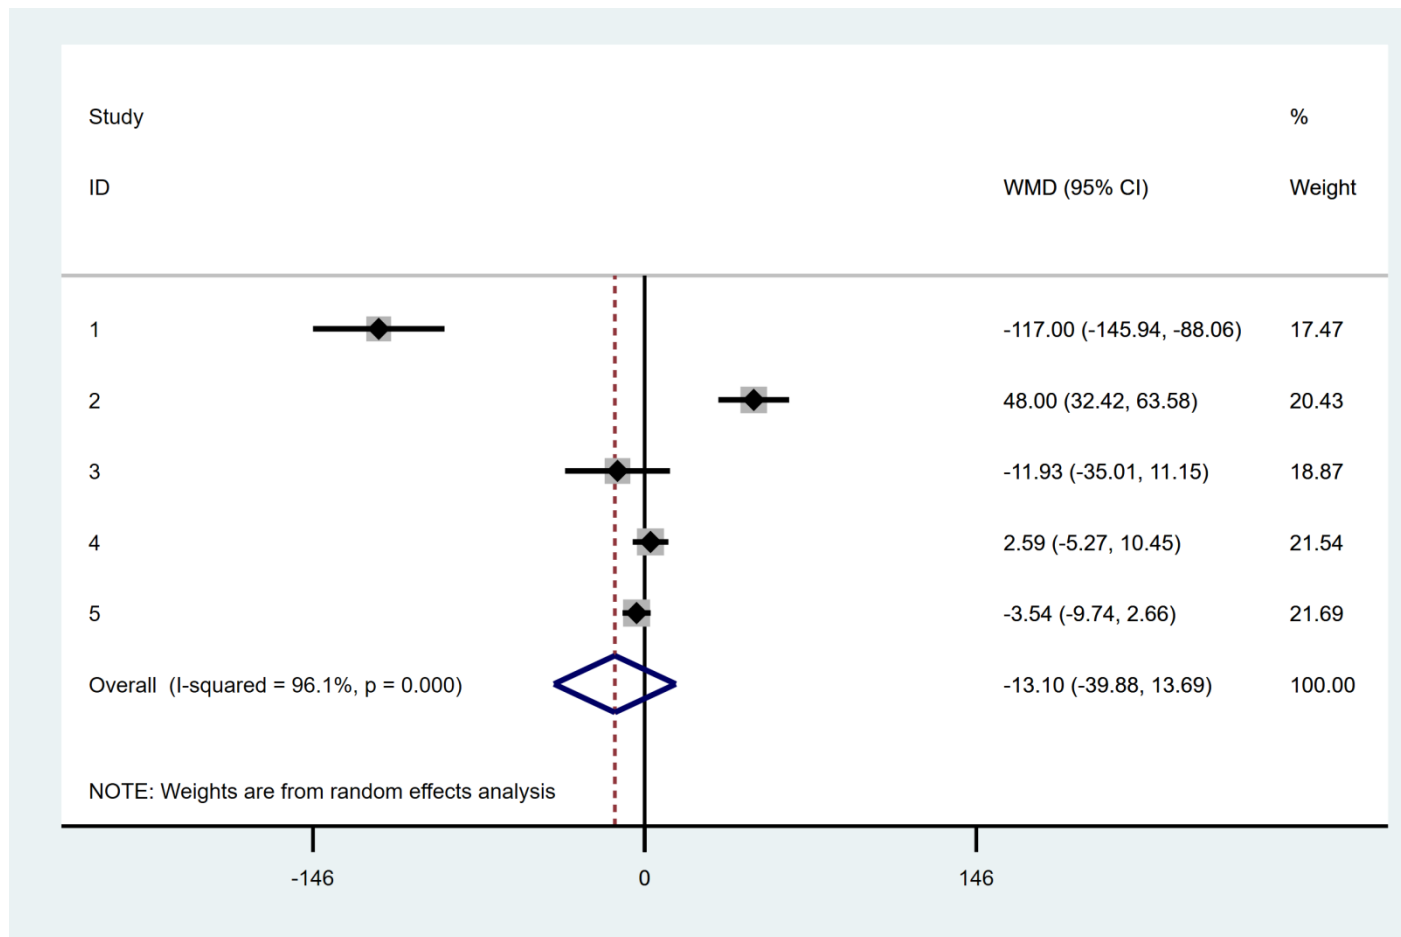

FigureS5(t) Forest plot of mean difference of 6MWT

**Note:** **e'**: early diastolic velocity; **E/e'**: mitral inflow E velocity to tissue doppler e' ratio; **E/A**: early diastolic to late diastolic velocities ratio; **CVD**: cardiovascular disease; **DPP-4i**: dipeptidyl peptidase-4 inhibitor; **GLP-1RA**: glucagon-like peptide-1 receptor agonist; **LVEDD**: left ventricular end-diastolic diameter; **LVEDV**: LV end-diastolic volume; **LVEF**: LV ejection fraction; **LVESD**: LV end-systolic diameter; **LVESV**: LV end-systolic volume; **LVMI**: LV mass index; **NT-pro BNP**: immunoreactive amino-terminal pro-brain natriuretic peptide; **SBP**: systolic blood pressure; **SGLT-2i**: sodium glucose cotransporter type 2 inhibitor; **T2DM**: type 2 diabetes; **6MWT**: 6-min walk test.
