# Supplementary material for: Effects of new hypoglycemic drugs on cardiac remodeling: a systematic review and network meta-analysis
Source: PubMed Central journal article supplement (PMC10251583; doi:10.1186/s12872-023-03324-6), 2023-06-09
Supplement: 12872_2023_3324_MOESM7_ESM.pdf [file 12872_2023_3324_MOESM7_ESM.pdf]

Table S3 Treatment Rankings

| Treatment | LVEF | LVEDD | LVESD | LVEDV | LVESV | LVMI | e' | E/e' | E/A | SBP | NT-pro BNP | 6MWT |
|-----------|------|-------|-------|-------|-------|------|----|------|-----|-----|------------|------|
| Placebo   | 1    | 4     | 3     | 2     | 3     | 4    | 3  | 2    | 3   | 2   | 2          | 3    |
| GLP-1RA   | 2    | 2     | 1     | 1     | 1     | 2    | 4  | 1    | 2   | 4   | 1          | 1    |
| DPP-4i    | 4    | 3     | -     | 3     | -     | 1    | 1  | 3    | 1   | 1   | 4          | -    |
| SGLT-2i   | 3    | 1     | 2     | 4     | 2     | 3    | 2  | 4    | 4   | 3   | 3          | 2    |

**Note:** e': early diastolic velocity; E/e': mitral inflow E velocity to tissue doppler e' ratio; E/A: early diastolic to late diastolic velocities ratio; CVD: cardiovascular disease; DPP-4i: dipeptidyl peptidase-4 inhibitor; GLP-1RA: glucagon-like peptide-1 receptor agonist; LVEDD: left ventricular end-diastolic diameter; LVEDV: LV end-diastolic volume; LVEF: LV ejection fraction; LVESD: LV end-systolic diameter; LVESV: LV end-systolic volume; LVMI: LV mass index; NT-pro BNP: immunoreactive amino-terminal pro-brain natriuretic peptide; SBP: systolic blood pressure; SGLT-2i: sodium glucose cotransporter type 2 inhibitor; T2DM: type 2 diabetes; 6MWT: 6-min walk test.
