# Supplementary material for: Effects of new hypoglycemic drugs on cardiac remodeling: a systematic review and network meta-analysis
Source: PubMed Central journal article supplement (PMC10251583; doi:10.1186/s12872-023-03324-6), 2023-06-09
Supplement: 12872_2023_3324_MOESM9_ESM.pdf [file 12872_2023_3324_MOESM9_ESM.pdf]

TableS3 League table

TableS3(a) Matrix of pairwise comparisons of regimens on change of LVEF% in subgroup of patients with CVD alone (shown as standard mean difference and 95% confidence intervals).

|           | A                 | B                   | C                  |
|-----------|-------------------|---------------------|--------------------|
| SCURA(%)  |                   |                     |                    |
| A         | 0                 | -1.65 (-2.81,-0.49) | -0.73 (-2.23,0.77) |
| B Placebo | 1.65 (0.49,2.81)  | 0                   | 0.92 (-0.02,1.86)  |
| C         | 0.73 (-0.77,2.23) | -0.92 (-1.86,0.02)  | 0                  |

Abbre: A GLP-1RA, B Placebo, C SGLT-2i

TableS3(b) Matrix of pairwise comparisons of regimens on change of LVEF% in subgroup of patients with CVD and T2DM (shown as standard mean difference and 95% confidence intervals).

|           | B                 | D                  | A                  | C                  |
|-----------|-------------------|--------------------|--------------------|--------------------|
| SCURA(%)  |                   |                    |                    |                    |
| B         | 0                 | -0.25 (-0.85,0.34) | -0.43 (-1.14,0.28) | -0.42 (-0.89,0.06) |
| D         | 0.25 (-0.34,0.85) | 0                  | -0.07 (-0.87,0.72) | -0.16 (-0.92,0.60) |
| A         | 0.43 (-0.28,1.14) | 0.07 (-0.72,0.87)  | 0                  | 0.01 (-0.51,0.54)  |
| C Placebo | 0.42 (-0.06,0.89) | 0.16 (-0.60,0.92)  | -0.01 (-0.54,0.51) | 0                  |

Abbre: A DDP-4i, B GLP-1RA, C Placebo, D SGLT-2i

TableS3(c) Matrix of pairwise comparisons of regimens on change of E/e' in subgroup of patients with CVD and T2DM (shown as standard mean difference and 95% confidence intervals).

|           | D                   | A                  | B                 | C                  |
|-----------|---------------------|--------------------|-------------------|--------------------|
| SCURA(%)  |                     |                    |                   |                    |
| D         | 0                   | 0.01 (-0.60,0.62)  | 0.53 (-0.05,1.11) | 0.43 (0.06,0.79)   |
| A         | -0.01 (-0.62,0.60)  | 0                  | 0.52 (-0.32,1.36) | 0.42 (-0.29,1.13)  |
| B         | -0.53 (-1.11,0.05)  | -0.52 (-1.36,0.32) | 0                 | -0.10 (-0.55,0.35) |
| C Placebo | -0.43 (-0.79,-0.06) | -0.42 (-1.13,0.29) | 0.10 (-0.35,0.55) | 0                  |

Abbre: A DDP-4i, B GLP-1RA, C Placebo, D SGLT-2i

Table S3(d) Matrix of pairwise comparisons of regimens on change of LVESV in subgroup of patients with CVD and T2DM (shown as standard mean difference and 95% confidence intervals).

|           | A                   | C                  | B                 |
|-----------|---------------------|--------------------|-------------------|
| SCURA(%)  |                     |                    |                   |
| A         | 0                   | 0.15 (-0.17,0.47)  | 0.33 (0.04,0.61)  |
| C         | -0.15 (-0.47,0.17)  | 0                  | 0.18 (-0.02,0.37) |
| B Placebo | -0.33 (-0.61,-0.04) | -0.18 (-0.37,0.02) | 0                 |

Abbre: A GLP-1RA, B Placebo, C SGLT-2i

Table S3(e) Matrix of pairwise comparisons of regimens on change of LVEDV in subgroup of patients with CVD and T2DM (shown as standard mean difference and 95% confidence intervals).

|           | B                  | D                  | C                  | A                 |
|-----------|--------------------|--------------------|--------------------|-------------------|
| SCURA(%)  |                    |                    |                    |                   |
| B         | 0                  | 0.09 (-0.33,0.52)  | 0.23 (-0.12,0.59)  | 0.37 (-0.24,0.99) |
| D         | -0.09 (-0.52,0.33) | 0                  | 0.14 (-0.09,0.37)  | 0.28 (-0.27,0.83) |
| C Placebo | -0.23 (-0.59,0.12) | -0.14 (-0.37,0.09) | 0                  | 0.14 (-0.36,0.64) |
| A         | -0.37 (-0.99,0.24) | -0.28 (-0.83,0.27) | -0.14 (-0.64,0.36) | 0                 |

Abbre: A DDP-4i, B GLP-1RA, C Placebo, D SGLT-2i

Table S3(f) Matrix of pairwise comparisons of regimens on change of SBP in subgroup of patients with CVD and T2DM (shown as standard mean difference and 95% confidence intervals).

|           | A                   | D                   | B                  | C                  |
|-----------|---------------------|---------------------|--------------------|--------------------|
| SCURA(%)  |                     |                     |                    |                    |
| A         | 0                   | 0.93 (0.44,1.43)    | 0.64 (0.03,1.25)   | -0.24 (-1.04,0.57) |
| D         | -0.93 (-1.43,-0.44) | 0                   | 0.12 (-0.32,0.56)  | 0.41 (0.15,0.67)   |
| B         | -0.64 (-1.25,-0.03) | -0.12 (-0.56,0.32)  | 0                  | 0.29 (-0.22,0.80)  |
| C Placebo | 0.24 (-0.57,1.04)   | -0.41 (-0.67,-0.15) | -0.29 (-0.80,0.22) | 0                  |

Abbre: A DDP-4i, B GLP-1RA, C Placebo, D SGLT-2i

Table S3(g) Matrix of pairwise comparisons of regmins on change of NT-pro BNP in subgroup of patients with CVD alone (shown as standard mean difference and 95% confidence intervals).

|           | A                  | B                  | C                 |
|-----------|--------------------|--------------------|-------------------|
| SCURA(%)  |                    |                    |                   |
| A         | 0                  | 0.30 (-0.17,0.77)  | 0.54 (-0.08,1.17) |
| B Placebo | -0.30 (-0.77,0.17) | 0                  | 0.25 (-0.16,0.65) |
| C         | -0.54 (-1.17,0.08) | -0.25 (-0.65,0.16) | 0                 |

Abbre: A GLP-1RA, B Placebo, C SGLT-2i

Table S3(h) Matrix of pairwise comparisons of regmins on change of 6MWT in subgroup of patients with CVD alone (shown as standard mean difference and 95% confidence intervals).

|           | A                 | C                  | B                  |
|-----------|-------------------|--------------------|--------------------|
| SCURA(%)  |                   |                    |                    |
| A         | 0                 | -0.86 (-2.68,0.97) | -1.31 (-2.95,0.33) |
| C         | 0.86 (-0.97,2.68) | 0                  | -0.45 (-1.26,0.35) |
| B Placebo | 1.31 (-0.33,2.95) | 0.45 (-0.35,1.26)  | 0                  |

Abbre: A = GLP-1RA, B = Placebo, C = SGLT-2i

TableS3(i) Matrix of pairwise comparisons of regimens on change of e' in overall population  
(shown as standard mean difference and 95% confidence intervals).

|           | A                | D                   | C                   | B                   |
|-----------|------------------|---------------------|---------------------|---------------------|
| SCURA(%)  |                  |                     |                     |                     |
| A         | 0                | -2.96 (-4.24,-1.68) | -3.82 (-4.72,-2.92) | -4.24 (-5.22,-3.27) |
| D         | 2.96 (1.68,4.24) | 0                   | -0.86 (-1.77,0.05)  | -1.28 (-2.27,-0.30) |
| C Placebo | 3.82 (2.92,4.72) | 0.86 (-0.05,1.77)   | 0                   | -0.43 (-0.81,-0.04) |
| B         | 4.24 (3.27,5.22) | 1.28 (0.30,2.27)    | 0.43 (0.04,0.81)    | 0                   |

Abbre: A DDP-4i, B GLP-1RA, C Placebo, D SGLT-2i

Table S3(j) Matrix of pairwise comparisons of regimens on change of E/e' in overall population  
(shown as standard mean difference and 95% confidence intervals).

|           | A                    | D                   | B                  | C                  |
|-----------|----------------------|---------------------|--------------------|--------------------|
| SCURA(%)  |                      |                     |                    |                    |
| A         | 0                    | 5.56 (-2.48,13.60)  | 5.78 (0.60,10.95)  | 5.97 (1.59,10.35)  |
| D         | -5.56 (-13.60,2.48)  | 0                   | 6.07 (-2.05,14.19) | 6.26 (-1.38,13.90) |
| B         | -5.78 (-10.95,-0.60) | -6.07 (-14.19,2.05) | 0                  | 0.19 (-2.60,2.98)  |
| C Placebo | -5.97 (-10.35,-1.59) | -6.26 (-13.90,1.38) | -0.19 (-2.98,2.60) | 0                  |

Abbre: A DDP-4i, B GLP-1RA, C Placebo, D SGLT-2i

Table S3(k) Matrix of pairwise comparisons of regimens on change of E/A in overall population  
(shown as standard mean difference and 95% confidence intervals).

|           | A                 | D                  | C                  | B                  |
|-----------|-------------------|--------------------|--------------------|--------------------|
| SCURA(%)  |                   |                    |                    |                    |
| A         | 0                 | -2.97 (-6.92,0.98) | -1.84 (-3.96,0.28) | -2.57 (-5.17,0.04) |
| D         | 2.97 (-0.98,6.92) | 0                  | -2.06 (-5.77,1.65) | -2.78 (-6.79,1.22) |
| C Placebo | 1.84 (-0.28,3.96) | 2.06 (-1.65,5.77)  | 0                  | -0.73 (-2.24,0.79) |
| B         | 2.57 (-0.04,5.17) | 2.78 (-1.22,6.79)  | 0.73 (-0.79,2.24)  | 0                  |

Abbre: A DDP-4i, B GLP-1RA, C Placebo, D SGLT-2i

Table S3(l) Matrix of pairwise comparisons of regimens on change of SBP in overall population  
(shown as standard mean difference and 95% confidence intervals).

|           | A                  | D                  | B                  | C                 |
|-----------|--------------------|--------------------|--------------------|-------------------|
| SCURA(%)  |                    |                    |                    |                   |
| A         | 0                  | 0.00 (-0.33,0.33)  | 0.46 (-0.20,1.13)  | 0.40 (-0.13,0.93) |
| D         | -0.00 (-0.33,0.33) | 0                  | -0.28 (-1.06,0.49) | 0.12 (-0.34,0.58) |
| B         | -0.46 (-1.13,0.20) | 0.28 (-0.49,1.06)  | 0                  | 0.40 (-0.22,1.02) |
| C Placebo | -0.40 (-0.93,0.13) | -0.12 (-0.58,0.34) | -0.40 (-1.02,0.22) | 0                 |

Abbre: A DDP-4i, B GLP-1RA, C Placebo, D SGLT-2i

TableS3(m) Matrix of pairwise comparisons of regimens on change of NT-pro BNP in overall population (shown as standard mean difference and 95% confidence intervals).

|           | D                  | B                  | C                  | A                 |
|-----------|--------------------|--------------------|--------------------|-------------------|
| SCURA(%)  |                    |                    |                    |                   |
| D         | 0                  | -0.14 (-0.94,0.66) | -0.14 (-0.87,0.60) | 0.28 (-0.49,1.04) |
| B         | 0.14 (-0.66,0.94)  | 0                  | 0.00 (-0.31,0.32)  | 0.14 (-0.43,0.71) |
| C Placebo | 0.14 (-0.60,0.87)  | -0.00 (-0.32,0.31) | 0                  | 0.14 (-0.33,0.62) |
| A         | -0.28 (-1.04,0.49) | -0.14 (-0.71,0.43) | -0.14 (-0.62,0.33) | 0                 |

Abbre: A DDP-4i, B GLP-1RA, C Placebo, D SGLT-2i

TableS3(n) Matrix of pairwise comparisons of regimens on change of 6MWT in overall population (shown as standard mean difference and 95% confidence intervals).

|           | A                 | C                  | B                   |
|-----------|-------------------|--------------------|---------------------|
| SCURA(%)  |                   |                    |                     |
| A         | 0                 | -1.18 (-2.74,0.38) | -1.52 (-2.76,-0.29) |
| C         | 1.18 (-0.38,2.74) | 0                  | -0.34 (-1.30,0.61)  |
| B Placebo | 1.52 (0.29,2.76)  | 0.34 (-0.61,1.30)  | 0                   |

Abbre: A GLP-1RA, B Placebo, C SGLT-2i

**Note:** **Abbre:** abbreviations; **e'**: early diastolic velocity; **E/e'**: mitral inflow E velocity to tissue doppler e' ratio; **E/A**: early diastolic to late diastolic velocities ratio; **CVD**: cardiovascular disease; **DPP-4i**: dipeptidyl peptidase-4 inhibitor; **GLP-1RA**: glucagon-like peptide-1 receptor agonist; **LVEDD**: left ventricular end-diastolic diameter; **LVEDV**: LV end-diastolic volume; **LVEF**: LV ejection fraction; **LVESD**: LV end-systolic diameter; **LVESV**: LV end-systolic volume; **LVMI**: LV mass index; **NT-pro BNP**: immunoreactive amino-terminal pro-brain natriuretic peptide; **SBP**: systolic blood pressure; **SGLT-2i**: sodium glucose cotransporter type 2 inhibitor; **T2DM**: type 2 diabetes; **6MWT**: 6-min walk test.
